# Supplementary material for: Kinase-inactivated CDK6 preserves the long-term functionality of adult hematopoietic stem cells
Source: PubMed Central journal article supplement — Blood. 2024 May 3;144(2):156–70. doi: 10.1182/blood.2023021985 (PMC11302456; doi:10.1182/blood.2023021985), 2024-05-03

1                   **Kinase-inactivated CDK6 preserves the long-term functionality**  
2                   **of adult hematopoietic stem cells**

3  
4 Isabella M. Mayer<sup>1</sup>, Eszter Doma<sup>1</sup>, Thorsten Klampfl<sup>1</sup>, Michaela Prchal-Murphy<sup>1</sup>, Sebastian  
5 Kollmann<sup>1</sup>, Alessia Schirripa<sup>1</sup>, Lisa Scheiblecker<sup>1</sup>, Markus Zojer<sup>1</sup>, Natalia Kunowska<sup>2</sup>, Lea  
6 Stanek<sup>1</sup>, Lisa E. Shaw<sup>3</sup>, Ulrike Mann<sup>3</sup>, Alex Farr<sup>4</sup>, Reinhard Grausenburger<sup>1</sup>, Gerwin Heller<sup>5</sup>,  
7 Eva Zebedin-Brandl<sup>6</sup>, Matthias Farlik<sup>3</sup>, Marcos Malumbres<sup>7-9</sup>, Veronika Sexl<sup>1,10</sup>, Karoline  
8 Kollmann<sup>1,\*</sup>

9  
10 <sup>1</sup> *University of Veterinary Medicine Vienna, Department of Biological Sciences and*  
11 *Pathobiology, Pharmacology and Toxicology, 1210 Vienna, Austria*

12 <sup>2</sup>*University of Graz, Pharmaceutical Chemistry, Institute of Pharmaceutical Sciences, 8010*  
13 *Graz, Austria*

14 <sup>3</sup>*Medical University of Vienna, Department of Dermatology, 1090 Vienna, Austria*

15 <sup>4</sup>*Medical University of Vienna, Department of Obstetrics and Gynecology, 1090 Vienna,*  
16 *Austria*

17 <sup>5</sup>*Medical University of Vienna, Department of Medicine I, Clinical Division of Oncology, 1090*  
18 *Vienna, Austria*

19 <sup>6</sup>*Medical University of Vienna, Institute of Pharmacology, Centre of Physiology and*  
20 *Pharmacology, 1090 Vienna, Austria*

21 <sup>7</sup>*Vall d'Hebron Institute of Oncology (VHIO), Cancer Cell Cycle group, 08035 Barcelona,*  
22 *Spain*

23 <sup>8</sup>*Spanish National Cancer Research Center (CNIO), Cell Division and Cancer group, 28029*  
24 *Madrid, Spain*

25 <sup>9</sup>*ICREA, 08010 Barcelona, Spain*

26 <sup>10</sup>*University of Innsbruck, 6020 Innsbruck, Austria*

27 *\*Lead contact*

28  
29 **\*Correspondence:** [karoline.kollmann@vetmeduni.ac.at](mailto:karoline.kollmann@vetmeduni.ac.at)

## 32 **Supplementary Methods**

### 33 *Animals*

34 Mice (C57BL/6N (*Cdk6*<sup>+/+</sup>), Ly5.1<sup>+</sup> [B6.SJL-Ptprca]/CD45.1<sup>+</sup>), *Cdk6*<sup>KM/KM</sup> (*Cdk6*<sup>K43M/K43M</sup>)<sup>1</sup>  
35 and *Cdk6*<sup>-/-2</sup> were bred and maintained under special pathogen-free (SPF) conditions at the  
36 Institute of Pharmacology and Toxicology, University of Veterinary Medicine Vienna, Austria.  
37 Age-matched (8-12 weeks) male and female mice were used unless indicated otherwise. All  
38 procedures and breeding were approved by the Ethics and Animal Welfare Committee of the  
39 University of Veterinary Medicine, Vienna in accordance with the University's guidelines for  
40 Good Scientific Practice and authorized by the Austrian Federal Ministry of Education, Science  
41 and Research (BMMWF-68.205/0093-WF/V/3b/2015, 2022-0.404.452, BMMWF-  
42 68.205/0112-WF/V/3b/2016, BMBWF-68.205/0103-WF/V/3b/2015 (TP), 2023-0.108.862) in  
43 accordance with current legislation.

44

### 45 *BM isolation and maintenance of BM derived HSC/LSK cells*

46 BM cell suspensions were prepared from *Cdk6*<sup>+/+</sup>, *Cdk6*<sup>-/-</sup> and *Cdk6*<sup>KM/KM</sup> mice by crushing  
47 femora, tibiae, and iliac crests in PBS. Subsequently, cell suspensions were filtered through 70  
48 µm cell strainers (Falcon), followed by washing and centrifugation for 5 min at 250 x g and re-  
49 suspended in ice cold 2% fetal bovine serum (FBS) (Capricorn Scientific)/PBS (Sigma  
50 Aldrich). Cell numbers of the isolated BM were calculated from both hind legs throughout the  
51 manuscript. Cells expressing lineage markers were depleted using, MagniSort™ mouse  
52 hematopoietic lineage depletion magnetic kit (Thermo Fischer Scientific) according to  
53 manufactures instructions, followed by staining the remaining lineage-negative cells described  
54 below. Single HSCs were sorted and cultured at 37°C and 5% CO<sub>2</sub> in U-bottom plates in 150  
55 µl StemSpan SFEM (Stem Cell Technologies) and 1000 sorted LSK cells in 200 µl StemSpan  
56 SFEM medium. Both medias were supplemented with 5% heat-inactivated FBS (Capricorn

57 Scientific), 100 U/ml penicillin, 100 µg/ml streptomycin (Sigma-Aldrich), 2 mM L-glutamine  
58 (Sigma-Aldrich), 20 ng/ml human Interleukin-11 (R&D Systems), and SCF (generated in-house)  
59 used at 2% final concentration.

60

#### 61 *Cell culture maintenance*

62 HPC<sup>LSK</sup> cell lines generated from *Cdk6*<sup>+/+</sup>, *Cdk6*<sup>-/-</sup> and *Cdk6*<sup>KM/KM</sup> mice were established,  
63 cultured and maintained as previously reported<sup>3</sup>. HPC-7 cells were maintained as described<sup>4</sup>.  
64 Platinum-E (plat-E) cells were cultured and maintained in DMEM medium supplemented with  
65 10% FBS (Capricorn Scientific) and 100 U/ml penicillin, and 100 µg/ml streptomycin (Sigma-  
66 Aldrich). All cells were routinely tested for mycoplasma contamination.

67

#### 68 *Knockout, knockdown and re-expression experiments*

69 3 clonal *Cdk6*<sup>-/-</sup> HPC-7 lines were generated by CRISPR technique using a guide RNA targeting  
70 the first exon of *Cdk6*, as previously described<sup>5</sup>. Briefly, 1x10<sup>6</sup> HPC-7 cells were resuspended  
71 in 100 µl 1M medium (5mM KCl; 15mM MgCl<sub>2</sub>; 120mM Na<sub>2</sub>HPO<sub>4</sub>/NaH<sub>2</sub>PO<sub>4</sub> pH7.2; 50mM  
72 Mannitol), mixed with 1µg control plasmid pSpCas9(BB)-2A-GFP(px458) or the plasmid  
73 expressing sgRNAs against *Cdk6* pSpCas9(BB)-2A-GFP(px458)- h*Cdk6*del, then transferred  
74 to 0.2 cm cuvette (VWR). Cells were electroporated using the program X-001 of Lonza®  
75 Nucleofector® II electroporation system. Transfected cells were cultured for 24h and GFP<sup>+</sup>  
76 cells were sorted using a FACSAria<sup>TM</sup> II cell sorter (BD Biosciences, San Jose, CA, USA) and  
77 plated as single cell suspension into 96-well plates and checked for *Cdk6* knockout by  
78 immunoblotting.

79 For the re-expression of *Cdk6* in the *Cdk6*<sup>-/-</sup> HPC-7 cell lines HA-CDK6 and HA-CDK6<sup>KM</sup>  
80 pMSCV-IRES-GFP plasmids were used. Knockdown experiments were performed using  
81 shRNAs targeting NFY-A cloned into the pLENC (pMSCV-miRE-PGK-NeoR-IRES-

82 mCherry) vector, as previously described<sup>6</sup>. Briefly, Plat-E cells were separately transfected with  
83 the following retroviral vectors: pLENC-shNFYA, pLENC-shRenilla, pMSCV-CDK6-HA-  
84 IRES-GFP, pMSCV-CDK6<sup>KM</sup>-HA-IRES-GFP using Turbofect (Thermo Scientific, Waltham,  
85 MA, USA) according to the manufacturer's instruction. The following day DMEM medium  
86 was changed to IMDM culture media supplemented with 5% heat-inactivated FBS (Capricorn  
87 Scientific), 100 U/ml penicillin, 100 µg/ml streptomycin and  $1.5 \times 10^{-4}$  M 1-thioglycerol  
88 (Sigma-Aldrich) and incubated 24hrs<sup>3</sup>. Viral supernatants were harvested, filtered (0.45 µm)  
89 and supplemented with 4 µg/ml polybrene and 2% SCF for HPC-7 cells; 4 µg/ml polybrene,  
90 2% SCF and 12.5 ng/ml IL-6 (Peprotech) for HPC<sup>LSK</sup> cells. Four to seven days after  
91 transduction, mCherry positive HPC<sup>LSK</sup>s and EGFP positive HPC7 cell pools were sorted with  
92 Cytoflex (Beckman Coulter).

93 To silence Maz, the cell penetrating Accell siRNA technology (Horizon Discovery) was used  
94 according to the manufacturer's instruction. Briefly, 2000 sorted LSK cells were targeted with  
95 2µM non-targeting Accell siRNA or Accell SMART pool directed against *Maz* (Horizon  
96 Discovery) from 12hrs to 72hrs in IMDM medium supplemented with 2% heat-inactivated FBS  
97 (Capricorn Scientific), 100 U/ml penicillin, 100 µg/ml streptomycin (Sigma-Aldrich), 20 ng/ml  
98 human Interleukin-11 (R&D Systems), and 2% SCF.

99

#### 100 *Human HSPC isolation*

101 Human HSPCs were isolated of umbilical cord blood donations at the general hospital of  
102 Vienna. For that purpose, mononuclear cells (MNCs) were extracted using Lymphoprep  
103 (StemCell Technologies, Vancouver, Kanada), red blood cells (RBCs) were depleted using  
104 ammonium chloride lysis buffer and CD34<sup>+</sup> cells were extracted via magnetic beads cell sorting  
105 (MACS) using CD34 MicroBead Kit Ultra Pure (Miltenyi Biotec GmbH, Bergisch Gladbach,

106 Germany). The experimental protocols involving human cord blood samples was approved by  
107 the Ethics Committee of the Medical University of Vienna (EK1553/2014).

108

#### 109 *Flow cytometry staining, acquisition and FACS sorting*

110 For flow cytometry sorts and analyses, BM cells or lineage-depleted BM cells were stained in  
111 2% FBS (Capricorn Scientific)/PBS (Sigma Aldrich) for 45 min with corresponding antibodies  
112 followed by PBS washing and centrifugation for 5 min at 250 x g.

113 Throughout the whole study the following lineage panel was used: TER-119-APC/Cy7,  
114 CD45R-APC/Cy7, Gr-1-APC/Cy7, CD3-APC/Cy7, Mac1-APC/Cy7. For characterization of  
115 the HSC compartment under homeostatic conditions and single treated pI:pC (InvivoGen), BM-  
116 derived from *Cdk6*<sup>+/+</sup>, *Cdk6*<sup>-/-</sup> and *Cdk6*<sup>KM/KM</sup> mice were stained with the lineage panel plus  
117 antibodies directed against c-Kit-PE-Cy5, Sca1-PE/Cy7, CD150-APC and CD48-PE.  
118 Following repetitive pI:pC (InvivoGen) injections, *Cdk6*<sup>+/+</sup>, *Cdk6*<sup>-/-</sup> and *Cdk6*<sup>KM/KM</sup> BM cells  
119 were stained with the lineage panel antibodies and c-Kit-PE-Cy5, CD86-PE/Cy7, CD150-APC,  
120 CD48-PE.

121 To detect HSC/MPP1 cells after serial BM transplantation and homing assay the lineage panel  
122 together with antibodies directed against c-Kit-PE-Cy5, Sca1-PE/Cy7, CD150-APC, CD48-PE,  
123 CD34-FITC, CD45.1-FITC, CD45.2-PB were used.

124 KI67/DAPI cell cycle staining was achieved as previously described<sup>7</sup>. Briefly, for intracellular  
125 staining cells were fixed, permeabilized and stained using the BD Fixation/Permeabilization  
126 Solution Kit (BD Biosciences) according to manufacturer's instructions. Cells were stained  
127 using the lineage panel and antibodies directed against Sca1-PE/Cy7 or alternatively CD86-  
128 PE/Cy7, c-Kit-PE-Cy5, CD150-APC and CD48-PE, KI67 in combination with 2 µg/ml DAPI.  
129 Intracellular stainings using antibodies against CDK6 (Invitrogen) and MAZ (Abcam) were  
130 carried out in *Cdk6*<sup>+/+</sup>, *Cdk6*<sup>-/-</sup> and *Cdk6*<sup>KM/KM</sup> BM cells as previously described<sup>8</sup>.

131 Following staining cells were washed with PBS, filtered through a 70  $\mu$ M filter and acquired  
132 by a flow cytometer (Cytotflex or Cytotflex S, Beckman Coulter or FACS Canto II, Becton  
133 Dickinson) or cell sorter (FACSARIAIII or Cytotflex machine equipped with 561 nm, 633 nm,  
134 395 and 488nm lasers, Becton Dickinson) for analysis or sort, respectively. For sorting a 100  
135  $\mu$ m nozzle and a maximum sort rate of 3000 cells/second was used. Data was analysed with  
136 FACSDiva, CytExpert or FlowJo software.

137

#### 138 *Cell proliferation analysis*

139 Single HSCs or 1000 LSK cells were sorted in one well of a U-shaped 96-well plate in several  
140 replicates and kept at 37°C, 5% CO<sub>2</sub> up to 10 days in StemSpan SFEM medium described  
141 above. HSC and LSK cell numbers were determined either by bright field microscopy  
142 (Olympus) for 3 days or by flow cytometry for 10 days, respectively.

143

#### 144 *Homing Assay*

145 Lineage depleted BM cells isolated from CD45.2<sup>+</sup> *Cdk6*<sup>+/+</sup>, *Cdk6*<sup>-/-</sup> and *Cdk6*<sup>KM/KM</sup> mice were  
146 prepared as described above. 4-6 mice were pooled and stained with the lineage panel plus  
147 antibodies directed against c-Kit-PE-Cy5, Sca1-PE/Cy7. 200.000 LSK cells/mouse were *i.v.*  
148 injected into CD45.1<sup>+</sup> recipient mice. 18 hours after transplantation, recipient mice were  
149 sacrificed and homing of immune-phenotypically identified CD45.2<sup>+</sup> HSC-MPP4 was analysed  
150 with flow cytometry.

151 For the Palbociclib homing assay, LSK cells (isolated and immunophenotyped as above) were  
152 treated for 24 hours with either 200 nM Palbociclib or PBS in StemSpan SFEM medium (Stem  
153 Cell Technologies), supplemented with 2% SCF. After 24 hours, cells were collected, and cell  
154 number was normalized to 200.000 cells/sample and *i.v.* injected into CD45.1<sup>+</sup> recipient mice.  
155 18 hours after transplantation, recipient mice were sacrificed and homing of immune-

156 phenotypically identified CD45.2<sup>+</sup> HSC-MPP4 was analysed with flow cytometry. Palbociclib  
157 (PD-0332991) was obtained from Pfizer (New York City, USA).

158

159 *Competitive transplantation experiments of Palbociclib pre-treated cells*

160 For competitive transplantation assay, 1000 CD45.2<sup>+</sup> and 1000 CD45.1<sup>+</sup> LSK cells were sorted  
161 from gender- and age-matched mice. CD45.2<sup>+</sup> LSK cells were treated with 200 nM Palbociclib  
162 (Palbo) for 72 hours and CD45.1<sup>+</sup> LSK cells with PBS (Ctrl) in SFEM medium supplemented  
163 with 2% SCF and 25 ng/ml TPO (PeproTech). Palbociclib treatment was refreshed after 48  
164 hours. After 72 hours incubation, cells were counted and equalized to a 1:1 ratio of PBS:Palbo  
165 and injected together with 1x10<sup>5</sup> GFP<sup>+</sup> carrier BM cells into lethally irradiated CD45.2<sup>+</sup>  
166 recipient mice by tail vein injection. 16 weeks post transplantation BM was analysed by flow  
167 cytometry for the contribution of Ly5.1<sup>+</sup> and Ly5.2<sup>+</sup> cells to individual HSPC.

168

169 *Competitive transplantation experiments of Cdk6<sup>+/+</sup> and Cdk6<sup>KM/KM</sup> BM cells*

170 For 1:1 competitive transplantation of CD45.1<sup>+</sup>Cdk6<sup>+/+</sup> and CD45.2<sup>+</sup>Cdk6<sup>+/+</sup> or  
171 CD45.2<sup>+</sup>Cdk6<sup>KM/KM</sup> BM cells were injected to lethally irradiated recipient mice and analysed,  
172 as previously described in Scheicher *et. al.*<sup>9</sup>.

173

174 *In vivo Palbociclib treatment followed by serial plating CFA*

175 Age- and gender-matched C57BL/6N wildtype animals were randomly assigned and orally  
176 exposed to either Palbociclib (50 mg/kg once per day) or equivalent volume of PBS vehicle.  
177 After 10 days of treatment, mice were sacrificed and BM cell populations were analysed by  
178 flow cytometry. As a second analysis, 250 HSC/MPP1 cells were sorted from the PBS- or  
179 Palbociclib-treated mice and seeded in methylcellulose for serial plating assay as described  
180 below. Additionally, 1000 LSK were treated either with 2 μM non-targeting Accell siRNA or

181 Accell SMART pool directed against *Maz* (media described above) for 24 hours before  
182 embedding in methylcellulose for colony formation assay as described below.

183

184 *Colony formation assay (CFA) and serial plating assay*

185 Either 250 HSC/MPP1 or 1000 LSK cells were re-suspended in 100  $\mu$ l IMDM (Sigma-Aldrich)  
186 medium supplemented with 20 ng/ml IL-3, IL-7, GM-CSF (R&D Systems), IL-6 (PeproTech),  
187 0.5% SCF, 200 ng/ml holo-transferrin, 10  $\mu$ g/ml insulin (Sigma-Aldrich) and 5 U/ml  
188 erythropoietin (EPO, Johnson & Johnson). Cell suspensions were subsequently mixed with 2  
189 ml of methylcellulose (MethoCult, Stem Cell Technologies), plated in 35 mm dishes and kept  
190 at 37°C, 5% CO<sub>2</sub> for 7 days. Colonies were counted and collected and analysed by flow  
191 cytometry using CD71-FITC, Ter119-Violet660, CD3/CD19-PE, Gr-1-PB450, CD11b-  
192 APCCy7, Sca1-PE/Cy7, c-Kit-PE-Cy5 antibodies. 30.000 cells were used for each re-plating  
193 round up to three rounds.

194

195 *Palbociclib CFA and serial plating assay*

196 1000 sorted LSK cells from BM of wild type mice were treated either with PBS or 200 nM  
197 Palbociclib in StemSpan SFEM medium (Stem Cell Technologies) supplemented with 2% SCF.  
198 After 72 hours treatment in liquid culture, cells were plated in methylcellulose as described  
199 above for 7 days. Colonies were counted and collected and analysed by flow cytometry as  
200 described above and 30 000 cells were used for further replating rounds.

201

202 *Human CFA*

203 1000 CD34<sup>+</sup> cord blood cells were seeded either with PBS or Palbociclib [200 nM] in  
204 methylcellulose enriched with cytokines (H4435, MethoCult). 10 days after plating, colonies



205 and cells were counted and analysed with flow cytometry. 25 000 cells were used for further  
206 replating rounds.

207

### 208 *Proximity ligation assay*

209 Proximity ligation assays were performed using the Duolink<sup>®</sup> flowPLA Detection Kit – Far  
210 Red (Sigma-Aldrich) according to the manufacturer instructions. Briefly, 10.000 HSC/MPP1  
211 cells from *Cdk6*<sup>+/+</sup>, *Cdk6*<sup>-/-</sup> and *Cdk6*<sup>KM/KM</sup> mice were FACS-sorted using the lineage panel plus  
212 antibodies directed against c-Kit-PE-Cy5, CD86-PE/Cy7, CD150-APC, CD48-PE and fixed  
213 with 2% paraformaldehyde (Sigma-Aldrich)/PBS at 37 °C for 10 min. Cells were permeabilized  
214 with 90% ice cold methanol in PBS/2% FBS/0.2% Tween-20 (Roth/Lactan) overnight at -20  
215 °C, followed by two washing rounds with PBS/2% FBS/0.2% Tween-20 (Roth/Lactan). Cells  
216 were incubated with the Duolink<sup>®</sup> Blocking Solution for 60 min at 37 °C, labelled with  
217 antibodies directed against CDK6 (1:250) and MAZ (1:250) on ice for 90 min and washed twice  
218 with Duolink<sup>®</sup> Wash Buffer. Following PLA probe incubation, ligation, amplification (37 °C,  
219 overnight) and detection steps (37 °C, 30 min) cells were analysed by flow cytometry.

220

### 221 *Transwell assay*

222 For migration analysis, a two-chamber transwell migration system (Thermo Fischer Scientific)  
223 was used. 50.000 LSK cells in 100 µl IMDM medium supplemented with 5% heat-inactivated  
224 FBS (Capricorn Scientific), 100 U/ml penicillin, 100 µg/ml streptomycin (Sigma-Aldrich) and  
225 2 mM L-glutamine (Sigma-Aldrich) was seeded to the upper chamber. The lower chamber  
226 contained the attractant medium of 450 µl IMDM supplemented with 2% SCF and 100ng/ml  
227 SDF-1 $\alpha$  (R&D Systems). Cells were incubated for 4h at 37°C and 5% CO<sub>2</sub>. Migrated cells were  
228 counted and analysed via flow cytometry using the lineage panel plus the following antibodies:  
229 c-Kit-PE-Cy5, Sca1-PE/Cy7, CD150-APC and CD48-PE.

230

231 *Nuclear and cytoplasmic cell fractionation*

232  $12 \times 10^6$  HPC<sup>LSK</sup> cells were washed with PBS and centrifuged for 5 min, 500 x g at 4°C. Cell  
233 pellets were resuspended in 800 µl buffer A (10 mM N-2-hydroxyethylpiperazine-N'-2-  
234 ethanesulfonic acid (HEPES) pH 7.9 (Sigma-Aldrich), 0.1 mM EDTA (Carl Roth), 0.1 mM  
235 EGTA (Sigma), 2 mM DTT (Sigma), 25 mM Na-fluoride (Merck), 1 mM PMSF (Sigma), 0.4  
236 mM Na-vanadate (Sigma), 10 mM KCl (Carl Roth), 20 µg/ml leupeptin (Sigma), 20 U/ml  
237 aprotinin (Sigma)). Samples were incubated for 15 min on ice and 10% NP-40 (0.6% final  
238 concentration) was added to the cells for 60 sec followed by a centrifugation step for 60 sec,  
239 13.000 g, 4°C. Cytoplasmic supernatant was collected into a new 1.5 ml tube and stored at -  
240 80°C. The nuclear pellet was washed five times with 1 ml ice cold PBS and centrifuged for 1  
241 min with 13.000 x g at 4°C. 80µl buffer B (20 mM HEPES pH 7.9, 25% glycerol, 0.4 mM Na-  
242 vanadate, 400 mM NaCl, 1 mM EGTA, 2 mM DTT, 1 mM EDTA, 25 mM Na-fluoride, 1 mM  
243 PMSF, 20 µg/ml leupeptin, 20 U/ml aprotinin) was added to the nuclear pellets. Samples were  
244 vigorously mixed on the shaker for 45 min at 4°C and centrifuged (5 min, 13.000, 4°C)  
245 afterwards. The supernatant (soluble nuclear fraction) was collected and stored at -80°C. The  
246 remaining pellet contained the chromatin residue, in which 80-100 µl Laemmli buffer (100 mM  
247 Tris/Hcl (pH 6.8) (Carl Roth), 2.5% sodium dodecyl sulfate (SDS) (Carl Roth), 10% glycerol  
248 (Carl Roth)) was added, sonicated for 15 min and mixed for 5 min at 95°C at the shaker. Protein  
249 concentrations were measured using either BCA Protein Assay Kit (Thermo Fischer Scientific)  
250 or Bradford Assay Kit (Thermo Fischer Scientific).

251

252 *NFY-A immunoprecipitation*

253  $12 \times 10^6$  HPC<sup>LSK</sup> cells per sample were washed with ice-cold PBS and lysed by snap-freezing in  
254 liquid nitrogen. Lysates were thawed on ice were pre-cleared with Protein-A/G-Agarose beads

255 (Thermo Fischer Scientific) in ELB buffer containing 0.1% NP-40, 50 mM HEPES (Sigma-  
256 Aldrich), 250 mM NaCl (Carl Roth), 5mM EDTA (Carl Roth) and proteinase inhibitors (Sigma-  
257 Aldrich) at 4°C for 2 hours on the rotation wheel. Protein concentration was determined with  
258 BCA Protein Assay Kit (Thermo Fischer Scientific). 300 µg protein lysates were used for  
259 further protocol procedures and input was kept as a control. 6 µg NFY-A antibody/sample was  
260 added and incubated under rotation at 4°C overnight. Next day, 40 µl Protein-A/G-Agarose  
261 beads (Thermo Fischer Scientific) per sample were prepared and pre-washed with ELB buffer.  
262 Samples were incubated for 2 hours at 4°C while rotating. Beads and supernatant were  
263 separated and 30 µg supernatant per sample was saved as a control. Beads were washed six  
264 times in ELB buffer and were eluted with 4x Laemmli buffer (100 mM Tris/Hcl (ph 6.8), 2.5%  
265 sodium dodecyl sulfate (SDS), 10% glycerol) for 10 minutes at 95°C. Eluates were loaded for  
266 immunoblot analysis as described below.

267

#### 268 *Immunoblotting*

269 Western blot analysis was done according to standard protocols. Briefly, HPC<sup>LSK</sup> cells were  
270 collected, washed with PBS and whole-cell lysates were made with 1x Laemmli buffer.  
271 Samples were incubated at 95°C for 5 min and sonicated for 15 min. Proteins were separated  
272 on a 12% SDS polyacrylamide gel and transferred to a PVDF (Millipore) membrane. Following  
273 antibodies were used for immunoblotting all at 1:1000 dilution: CDK6, NFY-A, GAPDH,  
274 RCC1, Lamin B1, HSC-70 and HSP-90. RCC1, Lamin B1 and HSP-90 served as fractionation  
275 controls, while GAPDH and HSC-70 as loading controls. For secondary antibodies, anti-mouse  
276 or anti-rabbit HRP conjugated antibodies were used. Chemiluminescent visualization was done  
277 with the ChemiDoc<sup>TM</sup> Touch imaging system (BioRad) after incubation of the membranes with  
278 Clarity Western ECL (BioRad) reagents.

279

280 *Nuclear co-IP, liquid chromatography, and LC-MS/MS mass spectrometry of HPC-7 cell lines*  
281  $60 \times 10^6$  *Cdk6*<sup>-/-</sup> HPC-7<sup>4,9</sup> cells re-expressing either HA-CDK6 or kinase-inactive HA-CDK6-  
282 K43M were used (see above) (two cell lines/genotype in duplicates). Nuclear and cytoplasmic  
283 fractions were collected as previously described<sup>10</sup>. Chromatin pellet was re-suspended in 200  
284  $\mu$ l benzonase buffer (20 mM Tris HCl (pH 8.0), 20 mM NaCl, 2 mM MgCl<sub>2</sub>, 200 U benzonase  
285 and proteinase inhibitors (Sigma-Aldrich)). Samples were incubated for 15 min at 4°C on the  
286 shaker and centrifuged 5 min 13000g at 4°C. Supernatant was collected which contained the  
287 chromatin fraction. Nucleoplasm and chromatin fraction were combined for protein  
288 measurement using BCA Protein Assay Kit (Thermo Fischer Scientific). 600  $\mu$ g protein was  
289 used for overnight immunoprecipitation of HA-tagged CDK6<sup>6</sup>.  
290 After washing of the beads four times with 200  $\mu$ l 100 mM TEAB (Sigma), beads were  
291 dissolved in 50  $\mu$ l 100 mM TEAB. For reduction 2.6  $\mu$ l of 100 mM TCEP (Roth) in 100 mM  
292 TEAB (30 min 37°C) were added, followed by alkylation with 2.1  $\mu$ l of 400 mM IAA (Sigma)  
293 in 100 mM TEAB (30 min 25°C). Finally, remaining IAA was quenched with 2.9  $\mu$ l 100 mM  
294 TCEP in 100 mM TEAB (10 min 37°C).  
295 For tryptic digest 2  $\mu$ l of Trypsin/LysC Mix (Promega, Madison, WI) were added. Digest  
296 proceeded for 14 hours at 37°C, followed by cool-down to 4°C. Digested peptides were  
297 removed using a magnetic rack and transferred to a fresh tube. Beads were washed twice with  
298 50  $\mu$ l 100 mM TEAB. The three portions of extracted peptides were combined, and digest was  
299 stopped by addition of 0.8  $\mu$ l conc. TFA (Fisher Scientific). Before LC-MS analysis peptide  
300 extracts were desalted and cleaned up using C18 spin tips according to the manufacturers  
301 protocol. The digested protein sample was dissolved in 24  $\mu$ l 0.1% TFA and 6  $\mu$ l were injected  
302 to the LC-MS system. Two technical replicates were analysed using a nanoRSLC-nESI-  
303 QExactive-Orbitrap HF MS/MS system (Thermo Fisher Scientific)<sup>11</sup>.

304 Raw data evaluation was performed with Proteome Discoverer software (version 2.4.1.15,  
305 Thermo Fisher Scientific). For database search a combination of the UniProt mouse database  
306 (taxonomy 10090, download March 2023, [www.uniprot.org](http://www.uniprot.org)) and a common contaminant  
307 database (<https://www.thegpm.org/crap/>, accessed on 25 June 2019) was used. The sequence  
308 for the K43M mutant of CDK6 was included in a custom-made database. Search parameters  
309 were applied as follows: enzyme trypsin (full); maximally 2 missed cleavages; 10 ppm  
310 precursor mass tolerance and 0.02 Da fragment mass tolerance; dynamic modifications allowed  
311 were oxidation/+15.995 Da (M)/deamidation/+0.984 Da (N, Q)/Gln->pyro-Glu/-17.027 Da  
312 (Q) and static modification carbamidomethylation/+57.021 Da (C).  
313 For intensity-based label-free quantification, protein abundance raw values were extracted in  
314 Proteome Discoverer software (Thermo Fisher) followed by normalization to total area sums  
315 and aggregation of protein abundances of technical replicates by the mean. After filtering and  
316 exclusion of proteins with one or two missing values per group, we calculated mean log2  
317 foldchanges of normalised abundance values for CDK6 vs CDK6<sup>-/-</sup> and for CDK6<sup>KM</sup> vs CDK6<sup>-/-</sup>  
318 <sup>-/-</sup> samples.

319

### 320 *Chromatin Immunoprecipitation (ChIP) quantitative PCR*

321  $1.5 \times 10^7$  HPC<sup>LSK</sup> cells were collected, crosslinked and sonicated as described previously<sup>8</sup>.  
322 Following steps were performed differently: Sheared chromatin was incubated either with 8  $\mu$ g  
323 anti-MAZ or anti-IgG (as control) antibodies at 4 °C overnight. For Selected pulled down  
324 genomic regions were quantified as described in <sup>10</sup>. Primer sequences for ChIP qPCR are listed  
325 in supplementary resource table.

326

### 327 **Transcriptomic analysis**

328

329 *Low-input RNA-Seq of transplanted HSC/MPP1 cells*

330 We sorted 100 cells into a 96 well plate equipped with 4  $\mu$ l lysis buffer following the protocol  
331 for Smart-seq2 library preparation as described previously<sup>12</sup>. Lysed cells were frozen at -80°C  
332 until further processing following the Smart-seq2 workflow. cDNA was amplified in a PCR  
333 reaction with 18cycles. 0,1ng of cDNA were subjected to library preparation. cDNA and final  
334 libraries were quality checked using D1000 and D5000 screen tapes (Agilent Technologies) on  
335 an Agilent 4200 Tapestation instrument. DNA concentration was determined using a Qubit  
336 Fluorometer (ThermoFisher/Invitrogen). Pooled libraries were sequenced on an Illumina Hi-  
337 seq4000 instrument using the 50bp single end configuration. Samples were sequenced at the  
338 Biomedical Sequencing Facility (BSF), CeMM Research Center for Molecular Medicine of the  
339 Austrian Academy of Sciences in Vienna, Austria.

340 *Read alignment and read counting.* Sequencing reads were quality controlled using the FastQC  
341 software (version 0.11.6)<sup>13</sup>. Adapter trimming and read filtering was performed using  
342 trimmomatic (version 0.36)<sup>14</sup>. The quality-controlled and filtered reads were then aligned  
343 against the mouse reference genome sequence (GENCODE version M13, primary assembly)<sup>15</sup>  
344 using STAR version 2.5.2b<sup>16</sup> with default parameters. Reads overlapping genes in the  
345 GENCODE M13 comprehensive gene annotation on the primary assembly were counted using  
346 the FeatureCounts function of the Subread package (version 1.5.1)<sup>17</sup>.

347 *Differential gene expression analysis.* The R package DESeq2 was used for differential gene  
348 expression analysis. Genes with very low expression levels (less than 10 counts across all  
349 samples) were excluded from the analysis. For the remaining genes, gene expression was  
350 modeled as a function of genotype (factor-encoded as “wt” = Cdk6<sup>+/+</sup>, “km” = Cdk6<sup>KM/KM</sup>, and  
351 “ko” = Cdk6<sup>KO/KO</sup> with “wt” as the reference level). Results for the three pairwise comparisons  
352 between the genotypes were extracted using the “results” function with the “contrast” argument  
353 set to the respective contrasts.

354 *Gene set enrichment analysis.* A “quiescent stem cell gene set” and an “activated stem cell gene  
355 set” were generated from data provided in Cabezas-Wallscheid *et al*, Cell Stem Cell 2014.<sup>18</sup>  
356 Table S2 from the publication was downloaded from  
357 [https://www.cell.com/cms/10.1016/j.stem.2014.07.005/attachment/5c5b3af3-fb97-4d01-805a-](https://www.cell.com/cms/10.1016/j.stem.2014.07.005/attachment/5c5b3af3-fb97-4d01-805a-1a55217a775d/mmc3.zip)  
358 [1a55217a775d/mmc3.zip](https://www.cell.com/cms/10.1016/j.stem.2014.07.005/attachment/5c5b3af3-fb97-4d01-805a-1a55217a775d/mmc3.zip) (last accessed 8 May 2023). The sheet termed “HSC\_MPP1 to  
359 MPP4\_quant\_29,841” contained gene expression data for HSC, MPP1, MPP2, MPP3 and  
360 MPP4 cells. The raw read counts (columns 49 to 64) were extracted and the DeSeq2 package’s  
361 “estimateSizeFactors” function and “count” function with the parameter “normalized” set to  
362 TRUE were used to generate normalized data. Table S2 also contained results from differential  
363 gene expression analyses. The comparison HSCs vs MPP1, resulted in 479 genes with an  
364 adjusted pvalue < 0.1 (column named “HSC:MPP1.padj”) which were regarded as differentially  
365 expressed. The heatmap in Supplementary Figure 4A of our paper depicts the normalized and  
366 z-transformed expression levels of these 479 genes in HSC and MPP1 cells and was drawn  
367 using the “pheatmap” function from the pheatmap R package.

368 The 479 genes were split into genes that were upregulated in HSC vs MPP1 cells  
369 (“UP\_in\_HSC” = “quiescent stem cell gene set”; 277 genes) or downregulated in HSC vs MPP1  
370 cells (“UP\_in\_MPP1” = “activated stem cell gene set”; 202 genes).

371 These two sets were used for gene set enrichment analysis (GSEA) using the pre-ranked  
372 method. First, ranked gene lists were generated from the results of each of the three differential  
373 gene expression analyses. For each ranked list, the ranking score was calculated for individual  
374 genes as  $-\log_{10}(p\text{-value}) * \text{sign}(\log_2 \text{fold-change})$ . An enrichment analysis of the “quiescent  
375 stem cell gene set” and the “activated stem cell gene set” against the three ranked gene lists was  
376 performed using default “GSEApreranked” parameters.

377 *Single cell transcriptomic analysis – single cell RNA-sequencing (scRNA-seq)*

378 30.000 LSK cells were FACS-purified from isolated BM and subjected to the single cell RNA-  
379 sequencing workflow using the Chromium NextGem Single Cell 5' v2 Kit solution (10X  
380 Genomics), according to the manufacturer's instructions. cDNA and final libraries were quality  
381 checked using D1000 and D5000 screen tapes (Agilent Technologies) on an Agilent 4200  
382 TapeStation instrument. DNA concentration was determined using a Qubit Fluorometer  
383 (ThermoFisher/Invitrogen). Pooled libraries were sequenced on an Illumina Nova-seq 6000  
384 instrument using the 75bp paired end configuration. Raw sequencing data were processed with  
385 the Cell Ranger v7.0.0 software (10x Genomics) for demultiplexing and alignment to the  
386 GRCmm10 mouse reference transcriptome. The Seurat software package<sup>19</sup> was used to analyse  
387 single cell RNA sequencing data in R. *Analysis of Cdk6<sup>+/+</sup>, Cdk6<sup>KM/KM</sup> and Cdk6<sup>-/-</sup> samples:*  
388 *Quality control and filtering.* Cells with less than 200 detected features were excluded from  
389 further analysis. Next, cells that had less than 2000 or more than 17000 UMI counts in total  
390 were excluded, as were cells that had less than 0.7 % or more than 2.5 % of their UMI counts  
391 mapping to mitochondrial genes.  
392 *Data integration.* After filtering, the data were normalized using the NormalizeData function  
393 and variable features were identified using the FindVariableFeatures function, both using  
394 default parameters. The samples were then integrated using the FindIntegrationAnchors (with  
395 2000 anchors and the *Cdk6<sup>+/+</sup>* sample as a reference) and IntegrateData functions.  
396 *UMAP construction.* The integrated data were scaled (ScaleData function) and a principal  
397 component analysis (PCA) was performed on the scaled data. Using the first 30 principal  
398 components, a uniform manifold approximation and projection (UMAP) was calculated.  
399 *Clustering.* A k-nearest-neighbor graph was generated, based on the first 30 principal  
400 components with a k-parameter of 7, followed by calculation of a shared nearest neighbour  
401 graph (FindNeighbors function). The FindClusters function was used with a resolution  
402 parameter of 0.4 to identify clusters.



403 *Subclustering of the HSPC cluster.* The entire dataset was then subset for cells within the  
404 hematopoietic stem and progenitor cell cluster (HSPC cluster). For this subset of cells a new  
405 UMAP was constructed as described above. Clustering was performed as described above,  
406 except that the k-parameter (FindNeighbors function) was set to 12 and the resolution parameter  
407 (FindClusters function) to 1 in this analysis. Relative cluster sizes and cluster marker genes  
408 were calculated as described above.

409 *Relative cluster sizes* were calculated as the percentage of cells in a cluster relative to all cells  
410 in a sample.

411 *Cluster marker genes* were identified using the FindConservedMarkers function. The resulting  
412 lists of marker genes were used to manually annotate clusters based on published literature<sup>20,21</sup>.  
413 For that, clusters were annotated by finding previously described marker genes, which were  
414 amongst the top cluster-enriched genes. The full lists of the LSK and HSPC subcluster marker  
415 genes are summarized in Supplementary Table 1-2. For the LSK cells, we identified 11  
416 individual clusters, which were annotated based on common expression of defined stem/lineage  
417 markers including: *Mecom* (stem cell), *Il7r*, *Dntt*, *Tcf7*, *Id2* (lymphoid), *Mcm3*, *Mki67*, *Ccnb2*  
418 (replication/cell cycle) and *ApoE*, *Ctsg* (myeloid). For the HSPC cluster, 6 clusters were  
419 identified and following defined marker genes were used for annotation: *Cd48* (differentiation),  
420 *Flt3*, *Cd69*, *Dntt* (lymphoid), *Mpo*, *ApoE* (myeloid) *Atpif1*, *Mki67* (cycle), *Irf7*, *Stat1*  
421 (interferon, IFN) and *Cd34*, *Mllt3*, *Pdzk1ip1*, *Mecom* (stem). Among the HSPC subcluster, the  
422 HSC cluster showed the nearest native dormant gene signature compared to the other  
423 subclusters.

424 *Differential gene expression analysis.* Pairwise differential gene expression analyses were  
425 performed between the three genotypes, separately for each cluster. We used the FindMarkers  
426 function with default parameters and considered only genes with an absolute log<sub>2</sub> fold-change  
427 of at least 0.3.

428 “PSig” and “QSig” gene signatures.<sup>22</sup> The “PSig” and “QSig” gene sets were downloaded  
429 from <https://journals.plos.org/plosbiology/article?id=10.1371/journal.pbio.0020301> (last  
430 accessed on 8 May 2023) as “Table S6 Genes in P-Sig” and “Table S7 Genes in Q-Sig”,  
431 respectively. These gene sets were used to attribute a “PSig score” and a “QSig score” to each  
432 cell of the HSPC cluster as follows of the 338 genes in the PSig gene set, 202 were found  
433 expressed in the HSPC cluster of our single cell data. The normalized gene expression values  
434 for these 202 genes were centered and scaled for each gene across all cells and samples of the  
435 HSPC cluster. Of these normalized, centered and scaled expression values the mean expression  
436 across the 202 genes was calculated for each cell. This value constituted the PSig score for the  
437 cells. A QSig score was calculated likewise using the 156 genes of the QSig gene set (298 in  
438 total) that were expressed in our data set.

439 *Analysis of the Palbociclib treated sample and the PBS-treated control sample:*

440 Single cell RNA-Seq analysis for the Palbociclib treated sample and the PBS-treated control  
441 sample was performed as described above, with the following exceptions:

442 *Quality control and filtering.* Low and high filtering cutoffs for UMI counts were 2500 and  
443 20000 counts, respectively. Low and high filtering cutoffs for the percent UMI counts mapping  
444 to mitochondrial genes were 0 % and 2.5 %, respectively.

445 *Data integration.* The reference sample for data integration was the PBS-treated control sample.

446 *Subclustering of the HSPC cluster.* The k-parameter of the FindNeighbors function was set to  
447 10 and the resolution parameter of the FindClusters function was set to 0.3.

448 *Cluster Marker genes.* The resulting lists of marker genes were used to manually annotate  
449 clusters based on published literature<sup>20,21</sup>. For that, clusters were annotated by finding  
450 previously described marker genes, which were amongst the top cluster-enriched genes. The  
451 full lists of the Palbociclib treated LSK and HSPC subcluster marker genes are summarized in  
452 Supplementary Table 3-4. For the LSK cells, we identified 13 individual clusters, which were

453 annotated based on common expression of defined stem/lineage markers including: *Cd34*,  
454 *Ifitm1* (stem cell), *Ube2c*, *Hist1h2ae* (cycle), *Dntt*, *Flt3* (lymphoid), *Pf4* (megakaryocyte),  
455 *Car1*, *Gata2* (erythroid), *Elane*, *Ctsg* (neutrophil), *Cd74*, *Siglech* (dendritic), *Cpa3*, *Gzmb*  
456 (granulocyte), *Lyz2* (dendritic/macrophage), *Ccl5*, *Tcf7* (innate lymphocyte), *Rps26*  
457 (Ribosome).

458 For the HSPC subcluster, 4 clusters were identified and following defined marker genes were  
459 used for annotation: *Elane*, *Mpo*, *Ctsg* (Neutrophil), *Cd74* (Dendritic), *Ctsg*, *Prtn3*  
460 (Granulocyte), *Cd63*, *Cd9* (immature, naïve).

461 *Heatmaps*. Log2 fold-changes used in heatmaps were calculated using the FoldChange function  
462 of the Seurat package. Heatmaps were plotted using the pheatmap function of the pheatmap R  
463 package.

#### 464 *Motif enrichment analysis*

465 Genelists (as RefSeq Ids) of significant differential expressed genes (DEG) from previous DE  
466 analysis (Split into 4 groups for analysis: Cdk6 ko vs wt downregulated, Cdk6 ko vs wt  
467 upregulated, Cdk6 K43M vs wt downregulated, Cdk6 K43M vs wt upregulated) were pasted  
468 into the web interface of Pscan (<http://159.149.160.88/pscan/>, Version: 1.6 (Last update: 23.  
469 Jun 2021 )) for a motif enrichment analysis. The settings were selected from the web interface  
470 as followed: Selected Organism: *Mus musculus*, Selected Region: -450 / +50 (Distance from  
471 TSS) and selected descriptors: *Jaspar\_2020\_NR*. The resulting predictions were downloaded as  
472 lists with names of enriched motifs (sorted by p-value), z-score tables of enriched motifs vs.  
473 gene promoters (of RefSeq IDs) and the motif logo of the top 10 enriched motifs (sorted by p-  
474 value).

#### 475 *CDK6 ChIP-seq and MAZ ChIP-seq overlap*

476 Bed files from MAZ ChIP-seq aligned to GRCm38/mm10 were obtained from Encode  
477 (<https://www.encodeproject.org/files/ENCFF058WWE/@@download/ENCFF058WWE.bed>).

478 gg).<sup>23</sup> MAZ peaks were overlapped with CDK6 consensus peaks from CDK6-HA ChIPseq of  
479 BCR/ABL<sup>+</sup> cell lines<sup>6</sup> using Homer (version 4.9.0). CDK6 consensus peaks represent peaks  
480 which are present in at least two of three biological replicates and absent in the consensus peak  
481 set of CDK6 ChIP-seq from *Cdk6*<sup>-/-</sup> control cell lines (*Cdk6*<sup>-/-</sup> consensus peak set are again peaks  
482 present in at least two out of three biological replicates). Homer was also used for annotation  
483 of peaks.

#### 484 *Quantification and statistical analysis*

485 Unless otherwise indicated, data are presented as mean +/- standard error of the mean (SEM).  
486 Statistical analyses were carried out either between groups or in comparison to the control  
487 group. For pairwise comparisons of single variables, two-sided Mann-Whitney tests were  
488 applied. Comparison of three groups or more were performed by one-way analysis of variance  
489 (ANOVA) test. If the ANOVA provided evidence that group means are different, Dunn's  
490 multiple comparison tests were done to determine which means amongst the set of means  
491 differed from the rest. Variables that showed a skewed data distribution were Log2 transformed.  
492 Statistical significance is indicated by one (p < 0.05), two (p < 0.01) or three (p < 0.001)  
493 asterisks. Analyses were performed using GraphPad Prism 8.4b software.

#### 494 *Data Sharing Statement*

495 The datasets are available via ArrayExpress (<https://www.ebi.ac.uk/biostudies/arrayexpress>)  
496 with the following accession numbers:

497 Low-input RNA-seq data: E-MTAB-13145, scRNA-seq data of *Cdk6*<sup>+/+</sup>, *Cdk6*<sup>KM/KM</sup> and *Cdk6*<sup>-/-</sup>  
498 LSK cells: E-MTAB-13149, and scRNA-seq data of Palbociclib or PBS pre-treated LSK cells:  
499 E-MTAB-13268.

500

#### 501 **Resource Table**

| REAGENT or RESOURCE | SOURCE | IDENTIFIER |
|---------------------|--------|------------|
| Antibodies          |        |            |

| <i>Antibodies used for Immunoblotting, IP or ChIP</i> |                  |              |
|-------------------------------------------------------|------------------|--------------|
| NFY-A                                                 | Santa Cruz       | #Sc-17753    |
| CDK6                                                  | Invitrogen       | #PA5-27978   |
| RCC1                                                  | Santa Cruz       | #55559       |
| Lamin B1                                              | Cell Signaling   | #134355      |
| HSC-70                                                | Santa Cruz       | #sc-7298     |
| GAPDH                                                 | Cell Signaling   | #51745       |
| HSP-90                                                | Santa Cruz       | #sc-13119    |
| MAZ                                                   | Abcam            | #ab85725     |
| IgG                                                   | Abcam            | #ab171870    |
| <i>Murine antibodies for flow cytometry</i>           |                  |              |
| TER119-APC/Cy7                                        | Invitrogen       | TER-119      |
| Gr1-APC/Cy7                                           | Biozym           | RB6-8C5      |
| CD19-APC/Cy7                                          | eBioscience      | eBio1D3      |
| CD3-APC/Cy7                                           | Biozym           | 17A2         |
| CD11b-APC/Cy7                                         | Invitrogen       | M1/70        |
| Sca1-PE/Cy7                                           | eBioscience      | D7           |
| c-kit-PE/Cy5                                          | Invitrogen       | 2B8          |
| CD150-APC                                             | Biozym           | TC15-12F12.2 |
| CD48-PE                                               | Biozym           | HM48-1       |
| CD34-FITC                                             | eBioscience      | RAM34        |
| CD19-PB                                               | eBioscience      | eBIO1D3      |
| Gr1-PB                                                | Invitrogen       | RB6-8C5      |
| CD11b-PB                                              | eBioscience      | M1/70        |
| TER-119                                               | eBioscience      | TER-119      |
| CD3-PB                                                | Biozym           | 17A3         |
| c-kit-FITC                                            | Biozym           | 2B8          |
| CD150-BV521                                           | Biozym           | TC15-12F12.2 |
| Ly5.1(CD45.1)-FITC                                    | Biozym           | A20          |
| Ly5.2(CD45.2)-PB                                      | eBioscience      | 104          |
| CD86-PE/Cy7                                           | Biozym/BioLegend | GL-1         |
| CD71-FITC                                             | eBioscience      | R17217       |
| CD3-PE                                                | Biozym/Biolegend | 17A2         |
| CD19-PE                                               | BD Biosciences   | 1D3          |
| FITC Mouse Anti-KI67 Set                              | BD Biosciences   | 556026       |

| <i>Human antibodies for flow cytometry</i>    |                            |             |
|-----------------------------------------------|----------------------------|-------------|
| CD38-PE/Cy7                                   | Biozym                     | Kappa HB-7  |
| CD34-PE                                       | Biozym                     | 581         |
| CD11b-APC/Cy7                                 | Biozym                     | ICRF44      |
| Cytokines                                     |                            |             |
| <i>Murine Cytokines</i>                       |                            |             |
| SCF                                           | VetMed (in-house)          |             |
| CXCL12/SDF-1 $\alpha$                         | R&D Systems                | 460-SD-050  |
| IL-3                                          | R&D Systems                | 403-ML      |
| IL-7                                          | R&D Systems                | 407-ML      |
| GM-CSF                                        | R&D Systems                | 415-ML-010  |
| TPO                                           | PeptoTech                  | 135-14      |
| <i>Human Cytokines</i>                        |                            |             |
| IL-6                                          | PeptoTech                  | 200-06      |
| IL-11                                         | R&D Systems                | 218-IL-025  |
| Erythropoietin                                | Janssen, Johnson & Johnson |             |
| Holo-transferrin                              | Sigma-Aldrich              | T0665-50MG  |
| Insulin                                       | Sigma-Aldrich              | I2643-25MG  |
| Chemicals, Peptides, and Recombinant Proteins |                            |             |
| Disuccinimidyl Glutarate                      | Thermo Scientific          | 20593       |
| PenStrep                                      | Sigma                      | P4333-100ML |
| 2-Mercaptoethanol                             | Sigma                      | M3148-250ML |
| Fetal Bovine Serum (FBS)                      | Capricorn Scientific       | FBS-12A     |
| IMDM medium                                   | Sigma                      | I3390-500ML |
| StemSpan™ SFEM medium                         | Stem Cell Technologies     | 09650       |
| RPMI medium                                   | Sigma-Aldrich/Merck        | R8758       |
| L-glutamine                                   | Sigma-Aldrich              | G7513-100ML |
| DAPI                                          | Sigma-Aldrich              | D9542       |
| Clarity Western ECL Substrate                 | BioRad                     | 1705061     |
| Immobilon® -P PVDF membrane                   | Millipore                  | IPVH00010   |
| Protein-A/G-Agarose                           | Thermo Fisher Scientific   | 11826784    |
| cOmplete™ Protease Inhibitor (PI) tablets     | Sigma-Aldrich/Roche        | 4693116001  |
| Critical Commercial Assays                    |                            |             |
| Duolink™ flowPLA Mouse/Rabbit Starter         | Sigma-Aldrich/Merck        | DUO94104    |
| Deposited Data                                |                            |             |

|                                                           |                                                 |                                                                                                     |
|-----------------------------------------------------------|-------------------------------------------------|-----------------------------------------------------------------------------------------------------|
| GEO Single cell RNA-Seq in progress                       | hscs                                            |                                                                                                     |
| Experimental Models: Cell Lines                           |                                                 |                                                                                                     |
| Murine HPC <sup>LSK</sup>                                 | Generated in house                              | 3                                                                                                   |
| Murine BCR/ABL <sup>p185+</sup>                           | Generated in house                              | 5                                                                                                   |
| Murine HPC7                                               |                                                 | 4                                                                                                   |
| Experimental Models: Organisms/Strains                    |                                                 |                                                                                                     |
| <i>Cdk6</i> <sup>-/-</sup>                                | VetMed                                          | C57BL/6                                                                                             |
| <i>Cdk6</i> <sup>KM/KM</sup>                              | VetMed                                          | C57BL/6                                                                                             |
| C57BL/6N                                                  | VetMed                                          | C57BL/6                                                                                             |
| Ly5.1 <sup>+</sup> (CD45.1 <sup>+</sup> )                 | Charles River                                   | B6.SJL-Ptprca                                                                                       |
| Software and Algorithms                                   |                                                 |                                                                                                     |
| GraphPad Prism (8.4.3.686)                                | GraphPad Software                               |                                                                                                     |
| FlowJo (v10.6.1)                                          | DeNovo Software                                 |                                                                                                     |
| Cytextpert (2.4.0.28)                                     | Beckman Coulter                                 |                                                                                                     |
| FACSDiva                                                  | BD                                              |                                                                                                     |
| Venny software 2.1.                                       | By Juan Carlos Oliveros,<br>BioinfoGP, CNB-CSIC |                                                                                                     |
| R 4.0.3 <sup>24</sup>                                     | R Foundation                                    | <a href="https://www.r-project.org/">https://www.r-project.org/</a>                                 |
| RStudio 1.3.1093 <sup>25</sup>                            | Rstudio                                         | <a href="https://posit.co/download/rstudio-desktop/">https://posit.co/download/rstudio-desktop/</a> |
| Seurat 3.2.3 <sup>19</sup>                                | CRAN                                            |                                                                                                     |
| DESeq2 1.30.0 <sup>26</sup>                               | Bioconductor                                    | <a href="https://bioconductor.org/packages/">https://bioconductor.org/packages/</a>                 |
| GSEA 4.1.0 <sup>27</sup>                                  | T                                               | <a href="http://www.broad.mit.edu/gsea/">http://www.broad.mit.edu/gsea/</a>                         |
| Proteome Discoverer software                              | Thermo Fisher Scientific                        | <a href="http://www.thermofisher.com">www.thermofisher.com</a>                                      |
| Other                                                     |                                                 |                                                                                                     |
| SureBeads <sup>TM</sup> Protein Magnetic Beads            | BIO-RAD                                         | 161-4023                                                                                            |
| Polyinosinic:polycytidylic acid (pI:pC)                   | InvivoGen                                       | tlrl-pic-5                                                                                          |
| Transwell <sup>TM</sup> permeable Supports 6,5 mm; 5      | Thermo Fisher Scientific                        | 10107341                                                                                            |
| MethoCult M3231                                           | StemCell Technologies                           | 03231                                                                                               |
| BD Cytofix/Cytoperm Plus Fixation<br>Permeabilization Kit | BD Biosciences                                  | 555028                                                                                              |

|                                                      |                             |                           |
|------------------------------------------------------|-----------------------------|---------------------------|
| MagniSort™ Mouse hematopoietic Lineage depletion kit | Thermo Fisher Scientific    | 8804-6829-74              |
| BCA Protein Assay Kit                                | Thermo Fisher Scientific    | 23225                     |
| Bradford Assay Kit                                   | Thermo Fisher Scientific    | 23246                     |
| Murine Primer (qPCR)                                 | Forward                     | Reverse                   |
| <i>Mlec</i>                                          | GGACAGTAGACGATGTACCA        | GAACATGAGGCTGCTGTT        |
| <i>Rplp0</i>                                         | AGATTCGGGATATGCTGTTGG       | AAAGCCTGGAAGAAGGAG<br>GTC |
| <i>Fosb</i>                                          | CCGAGAAGAGACACTTACCCC<br>AG | GCGATCTCCGACTCCAGC        |
| <i>Murine Primer (ChIP qPCR)</i>                     | <i>Forward</i>              | <i>Reverse</i>            |
| <i>Mlec</i>                                          | GAGCAACCTACCCCGACG          | CTTCAACCGAACTCCCTCC       |
| <i>Fosb</i>                                          | CCGACTGAGCTCCTTGTGG         | CCAAACAAACACTGGGCC<br>G   |
| <i>Hmgb2 pos. region</i>                             | CGCCATTTTTCAAACGCTTTTC      | AGGCTAAGCCTAGCAGGT<br>TC  |
| <i>Hmgb2 neg. region</i>                             | TCCAGAACACCAGAGCATAG        | AGGAACCAGAAACCAAAT<br>GAG |

502

503



504 **Supplementary Figure Legends**

505 **Figure S1: CDK6 shapes the HSC transcriptomic landscape in a kinase-inactivated,**  
506 **kinase -dependent and -independent manner**

507 CDK6 levels in (A) LSK and (B) HSC/MPP1 cells isolated from *Cdk6*<sup>+/+</sup>, *Cdk6*<sup>-/-</sup> and  
508 *Cdk6*<sup>KM/KM</sup> mice analysed by a flow cytometry based intracellular CDK6 staining (n = 4 per  
509 genotype, mean ± SEM, mean fluorescence intensity (MFI)). (C) (left) Western blot analysis  
510 and (right) protein quantification of CDK6 levels in lineage depleted BM of *Cdk6*<sup>+/+</sup>, *Cdk6*<sup>-/-</sup>  
511 and *Cdk6*<sup>KM/KM</sup> mice. HSC70 served as loading control (n=3 per genotype). (D) Flow cytometry  
512 analysis of *Cdk6*<sup>+/+</sup>, *Cdk6*<sup>-/-</sup> and *Cdk6*<sup>KM/KM</sup> BM cellularity. (E-F) Relative LSK, HSC, MPP1-  
513 MPP5 cell numbers (n = 10 per genotype, mean ± SEM). (G) Expression levels of key marker  
514 genes on UMAPs of *Cdk6*<sup>+/+</sup>, *Cdk6*<sup>-/-</sup> and *Cdk6*<sup>KM/KM</sup> LSK cells (H) Bar graph showing the  
515 relative abundance of each cell cluster *Cdk6*<sup>-/-</sup> or *Cdk6*<sup>KM/KM</sup> compared to *Cdk6*<sup>+/+</sup> control  
516 (Log<sub>2</sub>FC relative to *Cdk6*<sup>+/+</sup>). HSPC: Hematopoietic stem and progenitor cells, Rep:  
517 Replication, Lym1-5: Lymphoid cells, Myel 1-2: Myeloid cells, Cycle 1-2: Cell cycle. (I) (top)  
518 Representative flow cytometry plots of *Cdk6*<sup>+/+</sup>, *Cdk6*<sup>-/-</sup> and *Cdk6*<sup>KM/KM</sup> HSC/MPP1 cells  
519 depicting KI67/DAPI gating and percentages of cell cycle phases. (bottom) Percentages of cell  
520 cycle phase distributions of HSC/MPP1 cells (n ≥ 6; mean ± SEM). (J) Proliferation curves of  
521 sorted *Cdk6*<sup>+/+</sup>, *Cdk6*<sup>-/-</sup> and *Cdk6*<sup>KM/KM</sup> (left) LSK or (right) HSC cells (LSK n = 3, HSC n = 10,  
522 mean ± SEM). (K) Expression levels of key marker genes in *Cdk6*<sup>+/+</sup>, *Cdk6*<sup>-/-</sup> and *Cdk6*<sup>KM/KM</sup>  
523 cells on the UMAPs of the HSPC subcluster.

524

525 **Figure S2: Kinase-inactivated CDK6 maintains HSPC potential upon long-term challenge**

526 (A) Experimental overview of single pI:pC treatment. (B-C) Cell numbers of L<sup>-</sup>K<sup>+</sup>CD86<sup>+</sup> and  
527 L<sup>-</sup>K<sup>+</sup>CD86<sup>+</sup> HSC-MPP4 cells in *Cdk6*<sup>+/+</sup>, *Cdk6*<sup>-/-</sup> and *Cdk6*<sup>KM/KM</sup> mice upon single pI:pC  
528 injection (n=4 per genotype, mean ± SEM). (D) (top) Representative flow cytometry plots of

529 *Cdk6*<sup>+/+</sup>, *Cdk6*<sup>-/-</sup> and *Cdk6*<sup>KM/KM</sup> L<sup>-</sup>K<sup>+</sup>CD86<sup>+</sup> HSC/MPP1 cells depicting KI67/DAPI gating and  
530 percentages of cell cycle phases. (bottom) Percentages of cell cycle phase distributions of L<sup>-</sup>  
531 K<sup>+</sup>CD86<sup>+</sup> HSC/MPP1 upon single pI:pC treatment (n=3, mean ± SEM). (E) Total BM  
532 cellularity in *Cdk6*<sup>+/+</sup>, *Cdk6*<sup>-/-</sup> and *Cdk6*<sup>KM/KM</sup> mice upon serial pI:pC treatment (n ≥ 4 per  
533 genotype, mean ± SEM). (F) Flow cytometry analysis of *Cdk6*<sup>+/+</sup>, *Cdk6*<sup>-/-</sup> and *Cdk6*<sup>KM/KM</sup> (left)  
534 MPP2 (L<sup>-</sup>K<sup>+</sup>CD86<sup>+</sup>) and (right) MPP3/4 (L<sup>-</sup>K<sup>+</sup>CD86<sup>+</sup>) cells upon serial pI:pC injection (n ≥ 3  
535 per genotype, mean ± SEM). (G) Cell counts of serially plated *Cdk6*<sup>+/+</sup>, *Cdk6*<sup>-/-</sup> and *Cdk6*<sup>KM/KM</sup>  
536 BM cells upon serial pI:pC treatment (n ≥ 3 per genotype, mean ± SEM). (H) (left) Myeloid  
537 and (right) lymphoid lineage distributions of *Cdk6*<sup>+/+</sup>, *Cdk6*<sup>-/-</sup> and *Cdk6*<sup>KM/KM</sup> BM cells during 3  
538 rounds of serial plating (n = ≥ 3 per genotype, mean ± SEM).

539

### 540 **Figure S3: Kinase-inactivated CDK6 enhances HSC homing and self-renewal**

541 (A) (left) Experimental overview of an *in vitro* transwell assay. Percentage of migrated *Cdk6*<sup>+/+</sup>,  
542 *Cdk6*<sup>-/-</sup> and *Cdk6*<sup>KM/KM</sup> (middle) LSK or (right) HSC/MPP1 cells upon 4 hours of incubation  
543 (mean ± SEM, n = 3 per genotype). (B) Flow cytometry analysis of *in vivo* homed *Cdk6*<sup>+/+</sup>,  
544 *Cdk6*<sup>-/-</sup> and *Cdk6*<sup>KM/KM</sup> (left) MPP2 and (right) MPP3/4 (CD45.2<sup>+</sup>) cells in CD45.1<sup>+</sup> recipients  
545 18 hours post-injection (n ≥ 11/genotype, mean ± SEM). (C) Percentage of engrafted CD45.2<sup>+</sup>  
546 *Cdk6*<sup>+/+</sup>, *Cdk6*<sup>-/-</sup> and *Cdk6*<sup>KM/KM</sup> (left) MPP2 and (right) MPP3/4 cells during 4 rounds of serial  
547 transplantation (n = 3-6/genotype, mean ± SEM). (D) (left) Myeloid and (right) lymphoid  
548 lineage distribution of engrafted *Cdk6*<sup>+/+</sup>, *Cdk6*<sup>-/-</sup> and *Cdk6*<sup>KM/KM</sup> cells in the peripheral blood (n  
549 ≥ 3 / genotype, mean ± SEM). (F-G) Endpoint analysis of the competition transplantation assay  
550 depicting the competitor *Cdk6*<sup>+/+</sup> and *Cdk6*<sup>KM/KM</sup> (F) LSK, (G) (left) MPP2 and (right) MPP3/4  
551 cells (n = 6/group, mean ± SEM).

552

553

554 **Figure S4: Kinase-inactivated CDK6 balances quiescent and activated transcriptional**  
555 **programs of long-term HSCs**

556 **(A)** Heatmap presenting genes differentially expressed between HSC and MPP1 cells in  
557 Cabezas-Wallscheid, *et al*<sup>18</sup>. These genes formed the basis of the “quiescent” (277 genes) and  
558 “activated” (202 genes) gene sets which were used for gene set enrichment analysis. **(B)** Fold  
559 change (FC) of the dead cells of *Cdk6*<sup>+/+</sup>, *Cdk6*<sup>-/-</sup> and *Cdk6*<sup>KM/KM</sup> HPC<sup>LSK</sup> cells with shRenilla  
560 or shNFY-A analyzed by flow cytometry (n=3/genotype, mean ± SEM). **(C)** (left) Western blot  
561 analysis of *Cdk6*<sup>+/+</sup> and *Cdk6*<sup>-/-</sup> HPC<sup>LSK</sup> cells expressing either shRenilla or shNFY-A constructs  
562 and (right) NFY-A level quantification. CDK6 served as genotype, while HSC70 as loading  
563 control.

564  
565 **Figure S5: CDK6-MAZ interaction maintains HSC stemness**

566 **(A)** Venn diagram showing *Cdk6*<sup>KM/KM</sup> and *Cdk6*<sup>-/-</sup> specific motifs over *Cdk6*<sup>+/+</sup> found in the  
567 quiescent stem cell gene set (p < 0.01). **(B)** Pathway analysis of common CDK6 and MAZ  
568 ChIP-seq peaks. **(C)** MAZ or IgG control ChIP-quantitative polymerase chain reaction (qPCR)  
569 analysis of *Cdk6*<sup>+/+</sup> HPC<sup>LSK</sup> cell lines treated either with PBS (Ctrl) or Palbociclib (200nM) for  
570 24 hours: qPCR was used to quantify MAZ enrichment on *Fosb*, *Mlec* and *Hmgb2* promoter or  
571 negative region for *Hmgb2* (n = 3/group, mean ± SEM). **(D)** qPCR analysis of *Fosb* and *Mlec*  
572 mRNA levels in sorted LSK cells treated with siRNA MAZ (24 hours) +/- Palbociclib (200nM,  
573 4 hours), depicted as FC relative to non-treated scramble control (n = 3/group, mean ± SEM).  
574 **(E)** Analysis of MAZ knockdown in sorted *Cdk6*<sup>+/+</sup> LSK cells. (left) Overlay of representative  
575 histograms of MAZ MFI levels in scramble Ctrl and siMAZ knockdown LSKs. (right) Flow  
576 cytometry analysis of MAZ levels in LSK cells relative to scramble Ctrl (n = 3/group, mean ±  
577 SEM). **(F)** Flow cytometry analysis of LSK cells upon MAZ knock down and/or Palbociclib  
578 treatment depicted as Log<sub>2</sub>FC relative to corresponding scramble control (n = 4 per genotype,  
579 mean ± SEM).

580

581 **Figure S6: CDK4/6 kinase inhibition protects HSC fitness**

582 **(A-B)** Expression levels of key marker genes on UMAPs of Palbociclib or Ctrl treated **(A)** LSK  
583 cells or **(B)** in the HSPC subcluster. **(C)** Heatmap of 282 upregulated common genes identified  
584 in Fig.5G of either in the comparison  $Cdk6^{KM/KM}$  vs  $Cdk6^{+/+}$  or *Palbo* vs *Ctrl* of the dormant or  
585 immature HSPC subcluster [Log<sub>2</sub>FC]. **(D)** Schematic representation of the *in vivo* homing assay  
586 upon Palbociclib treatment. **(E)** Flow cytometry analysis of homed CD45.2<sup>+</sup> LSK and  
587 HSC/MPP1-MPP4 cells pretreated either with PBS (Ctrl) or Palbociclib into CD45.1<sup>+</sup> recipients  
588 18h post-injection (n ≥ 10 recipients and donors, mean ± SEM). **(F)** (left) Experimental  
589 workflow of sorted LSK cells treated with either PBS (Ctrl) or Palbociclib followed by a serial  
590 plating assay. (right) Colony numbers and percentage of LSK and lineage<sup>+</sup> cells treated with  
591 either Palbociclib or Ctrl are depicted as Log<sub>2</sub>FC relative to PBS control during 3 rounds of  
592 serial plating (n = 4/treatment, mean ± SEM). **(G-I)** Flow cytometry analysis of BM cells  
593 following *in vivo* Palbociclib treatment (1<sup>st</sup> analysis described in Fig.6F): **(G)** percentages of  
594 LSK, MPP2 and MPP3/4 cells and **(H)** cell numbers of LSK, HSC/MPP1, MPP2 and MPP3/4  
595 cells (n ≥ 4/group, mean ± SEM), **(I)** Flow cytometry analysis of BM myeloid cells. **(J, K)** Flow  
596 cytometry analysis of serially plated BM cells following *in vivo* Palbociclib treatment (2<sup>nd</sup>  
597 analysis described in Fig.6F): **(J)** Colony and cell numbers, **(K)** percentage of LSK cells upon  
598 *in vivo* Palbociclib treatment followed by 2 rounds of serial plating (n = 4/group, mean ± SEM).  
599 **(L)** Colony and **(M)** LSK cell numbers of siMAZ knockdown following the *in vivo* Palbociclib  
600 treatment (described in Fig.6F) of sorted and embedded LSK cells depicted as Log<sub>2</sub>FC relative  
601 to the corresponding scramble control (n = 2/group, mean ± SEM). **(N-O)** Endpoint analysis of  
602 competition transplantation assay described in Fig.6I: **(N)** Percentage of engraftment of  $Cdk6^{+/+}$   
603 and  $Cdk6^{KM/KM}$  LSK, HSC/MPP1, MPP2 and MPP3/4 cells and **(O)** cell numbers of engrafted

604 MPP2 and MPP3/4 subfractions ( $n = 7/\text{group}$ , mean  $\pm$  SEM). **(P)** Percentage of CD11b<sup>+</sup> human  
605 cells after two rounds of serial plating ( $n \geq 3$ , mean  $\pm$  SEM).

606 **References**

- 607 1. Hu MG, Deshpande A, Schlichting N, et al. CDK6 kinase activity is required for thymocyte  
608 development. *Blood*. 2011;117(23):6120–6131.
- 609 2. Malumbres M, Sotillo R, Santamaría D, et al. Mammalian Cells Cycle without the D-Type  
610 Cyclin-Dependent Kinases Cdk4 and Cdk6. *Cell*. 2004;118(4):493–504.
- 611 3. Doma E, Mayer IM, Brandstoeetter T, et al. A robust approach for the generation of  
612 functional hematopoietic progenitor cell lines to model leukemic transformation. *Blood*  
613 *Advances*. 2021;5(1):39–53.
- 614 4. Pinto do O P. Expression of the LIM-homeobox gene LH2 generates immortalized Steel  
615 factor-dependent multipotent hematopoietic precursors. *The EMBO Journal*.  
616 1998;17(19):5744–5756.
- 617 5. Heller G, Nebenfuehr S, Bellutti F, et al. The Effect of CDK6 Expression on DNA  
618 Methylation and DNMT3B Regulation. *iScience*. 2020;23(10):101602.
- 619 6. Bellutti F, Tigan A-S, Nebenfuehr S, et al. CDK6 Antagonizes p53-Induced Responses  
620 during Tumorigenesis. *Cancer Discov*. 2018;8(7):884–897.
- 621 7. Galvin A, Weglarz M, Folz-Donahue K, et al. Cell Cycle Analysis of Hematopoietic Stem  
622 and Progenitor Cells by Multicolor Flow Cytometry. *Current Protocols in Cytometry*.  
623 2019;87(1):e50.
- 624 8. Kollmann S, Grausenburger R, Klampfl T, et al. A STAT5B–CD9 axis determines self-  
625 renewal in hematopoietic and leukemic stem cells. *Blood*. 2021;138(23):2347–2359.
- 626 9. Scheicher R, Hoelbl-Kovacic A, Bellutti F, et al. CDK6 as a key regulator of hematopoietic  
627 and leukemic stem cell activation. *Blood*. 2015;125(1):90–101.
- 628 10. Brandstoeetter T, Schmoellerl J, Grausenburger R, et al. SBNO2 is a critical mediator of  
629 STAT3-driven hematological malignancies. *Blood*. 2023;141(15):1831–1845.

- 630 11. Mayr A-L, Hummel K, Leitsch D, Razzazi-Fazeli E. A Comparison of Bottom-Up  
631 Proteomic Sample Preparation Methods for the Human Parasite *Trichomonas vaginalis*.  
632 *ACS Omega*. 2024;9(8):9782–9791.
- 633 12. Picelli S, Faridani OR, Björklund ÅK, et al. Full-length RNA-seq from single cells using  
634 Smart-seq2. *Nat Protoc*. 2014;9(1):171–181.
- 635 13. FastQC, Babraham Bioinformatics.
- 636 14. Bolger AM, Lohse M, Usadel B. Trimmomatic: a flexible trimmer for Illumina sequence  
637 data. *Bioinformatics*. 2014;30(15):2114–2120.
- 638 15. Frankish A, Diekhans M, Ferreira A-M, et al. GENCODE reference annotation for the  
639 human and mouse genomes. *Nucleic Acids Research*. 2019;47(D1):D766–D773.
- 640 16. Dobin A, Davis CA, Schlesinger F, et al. STAR: ultrafast universal RNA-seq aligner.  
641 *Bioinformatics*. 2013;29(1):15–21.
- 642 17. Liao Y, Smyth GK, Shi W. featureCounts: an efficient general purpose program for  
643 assigning sequence reads to genomic features. *Bioinformatics*. 2014;30(7):923–930.
- 644 18. Cabezas-Wallscheid N, Klimmeck D, Hansson J, et al. Identification of Regulatory  
645 Networks in HSCs and Their Immediate Progeny via Integrated Proteome, Transcriptome,  
646 and DNA Methylome Analysis. *Cell Stem Cell*. 2014;15(4):507–522.
- 647 19. Stuart T, Butler A, Hoffman P, et al. Comprehensive Integration of Single-Cell Data. *Cell*.  
648 2019;177(7):1888-1902.e21.
- 649 20. Giladi A, Paul F, Herzog Y, et al. Single-cell characterization of haematopoietic progenitors  
650 and their trajectories in homeostasis and perturbed haematopoiesis. *Nat Cell Biol*.  
651 2018;20(7):836–846.
- 652 21. Rodriguez-Fraticelli AE, Weinreb C, Wang S-W, et al. Single-cell lineage tracing unveils  
653 a role for TCF15 in haematopoiesis. *Nature*. 2020;583(7817):585–589.

- 654 22. Venezia TA, Merchant AA, Ramos CA, et al. Molecular Signatures of Proliferation and  
655 Quiescence in Hematopoietic Stem Cells. *PLoS Biol.* 2004;2(10):e301.
- 656 23. Yue F, Cheng Y, Breschi A, et al. A comparative encyclopedia of DNA elements in the  
657 mouse genome. *Nature.* 2014;515(7527):355–364.
- 658 24. R Core Team. A language and environment for statistical computing. R Foundation for  
659 Statistical Computing, Vienna, Austria. 2020;
- 660 25. RStudio Team. RStudio: Integrated Development Environment for R. RStudio, PBC,  
661 Boston, MA.
- 662 26. Love MI, Huber W, Anders S. Moderated estimation of fold change and dispersion for  
663 RNA-seq data with DESeq2. *Genome Biol.* 2014;15(12):550.
- 664 27. Subramanian A, Tamayo P, Mootha VK, et al. Gene set enrichment analysis: A knowledge-  
665 based approach for interpreting genome-wide expression profiles. *Proc. Natl. Acad. Sci.*  
666 *U.S.A.* 2005;102(43):15545–15550.
- 667



# Supp Fig 1

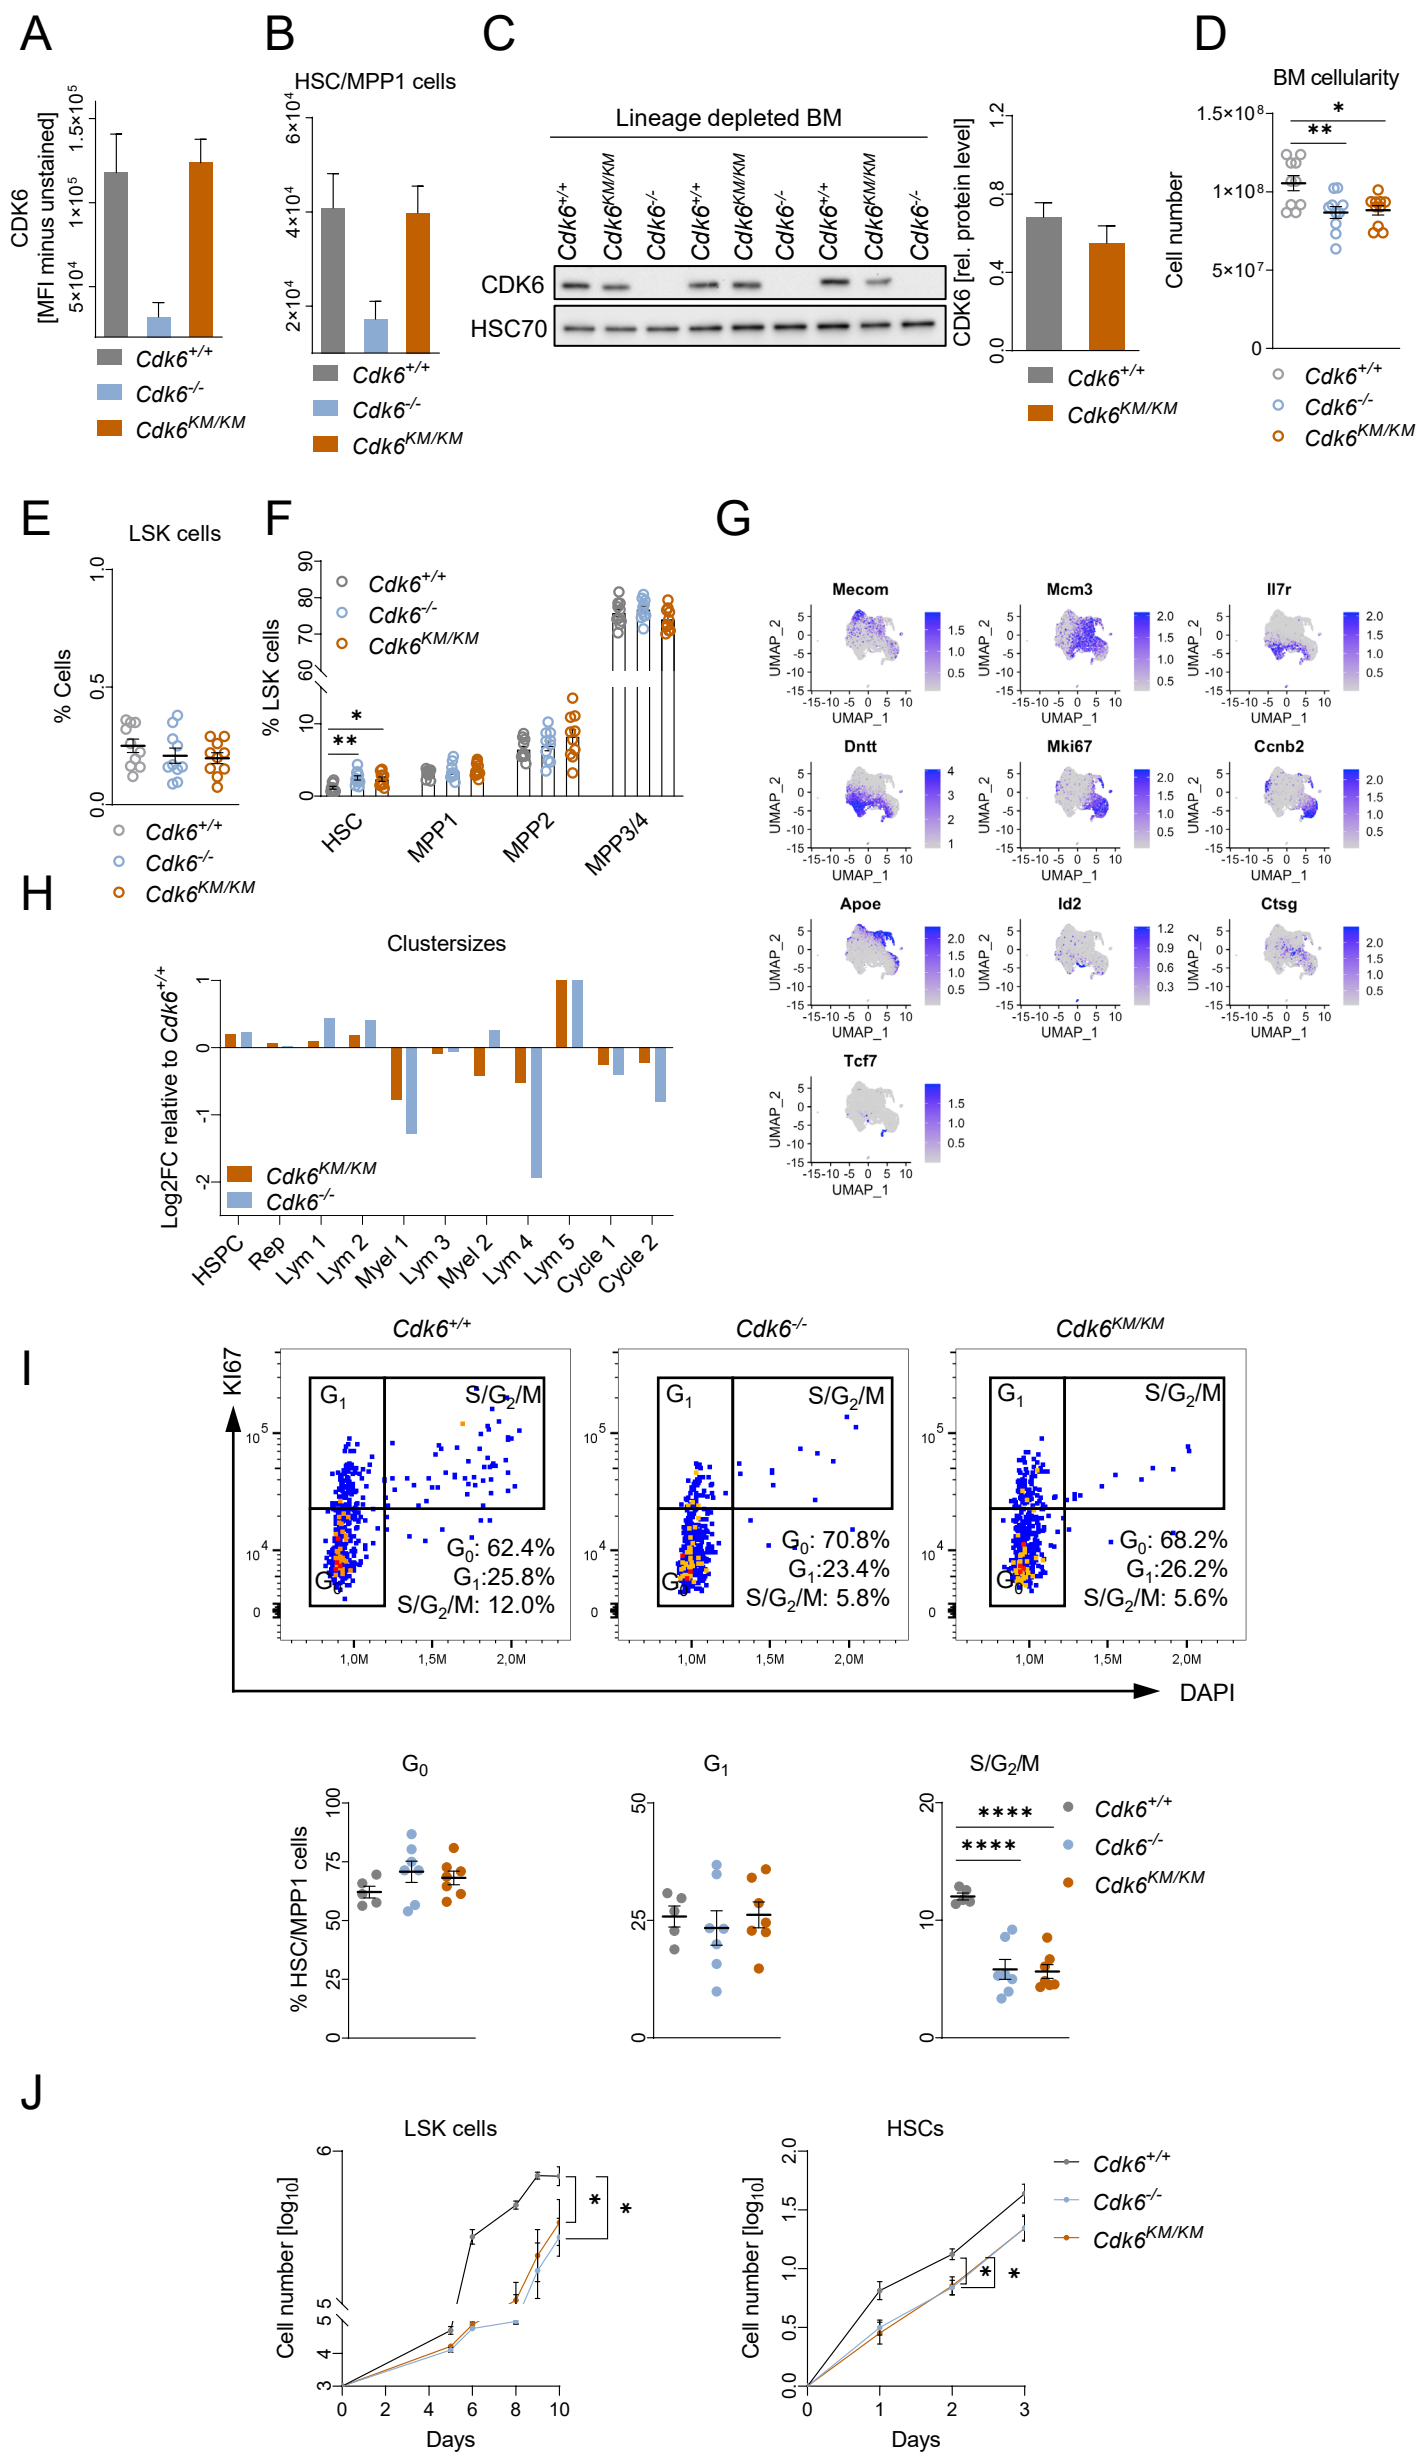

# Supp Fig 1

K

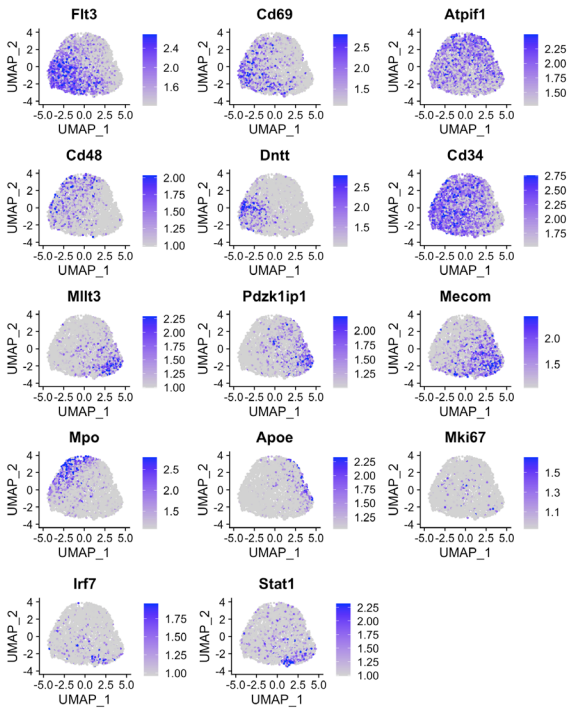

# Supp Fig 2

## A

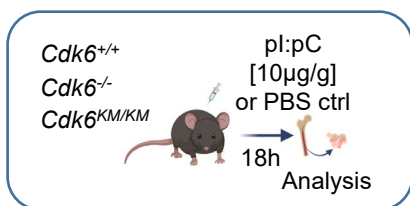

## B

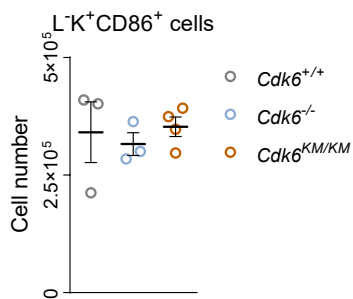

## C

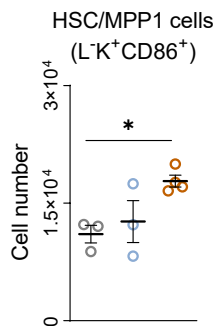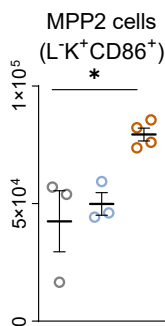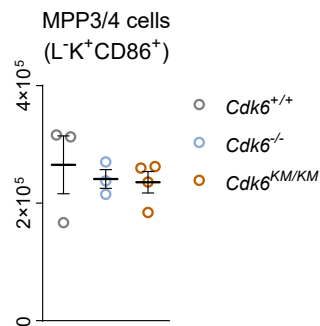

## D

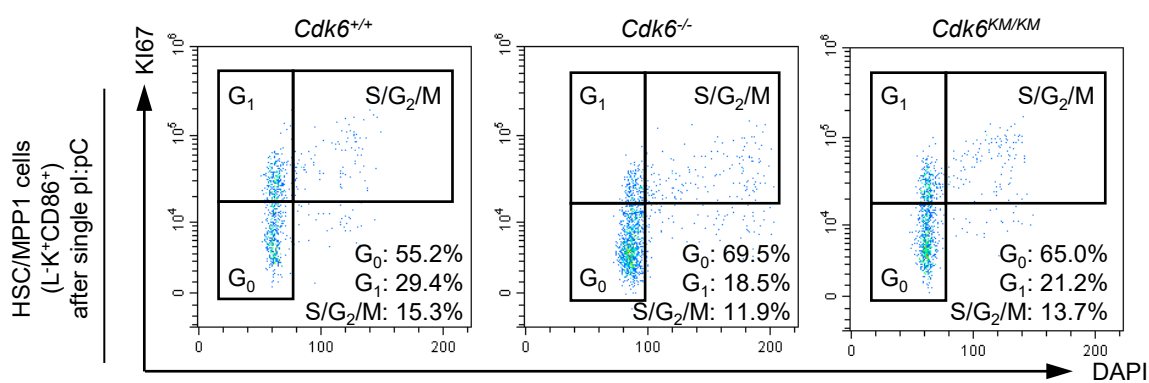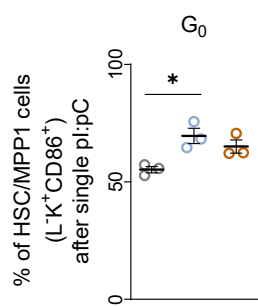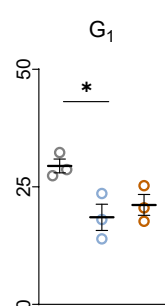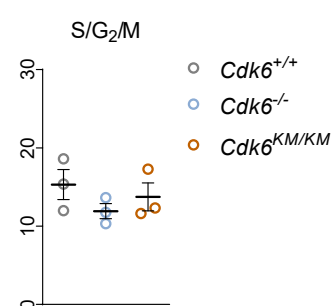

## E

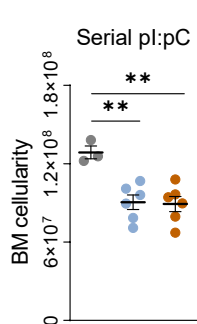

## F

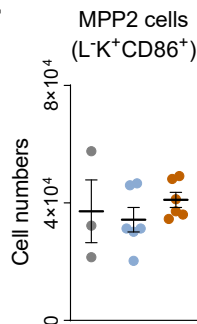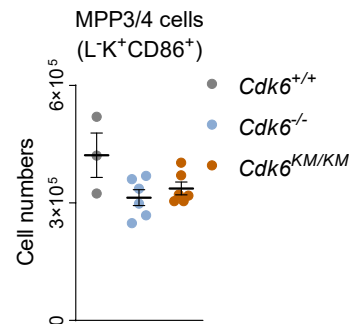

## G

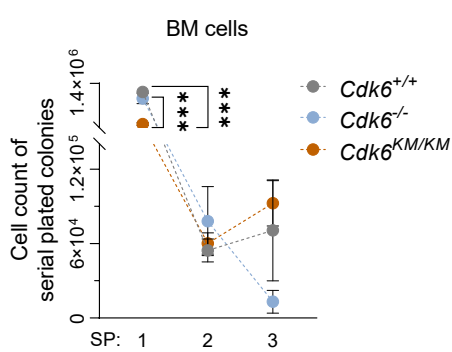

## H

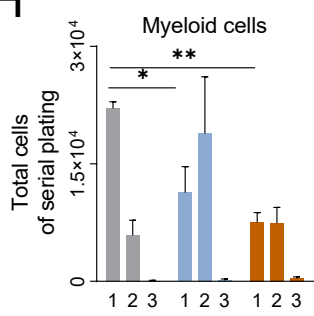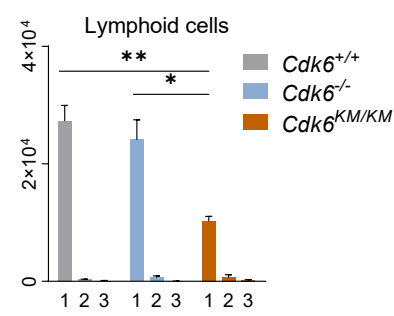

# Supp Fig 3

**A**

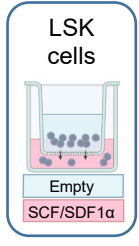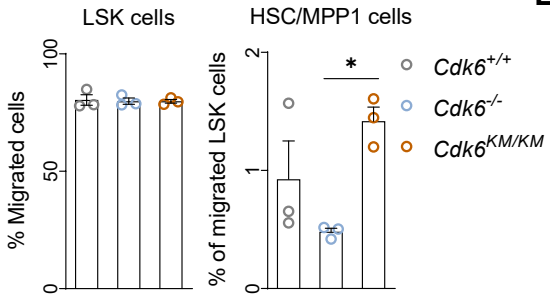

**B**

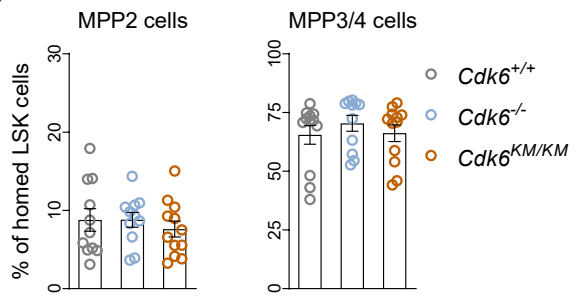

**C**

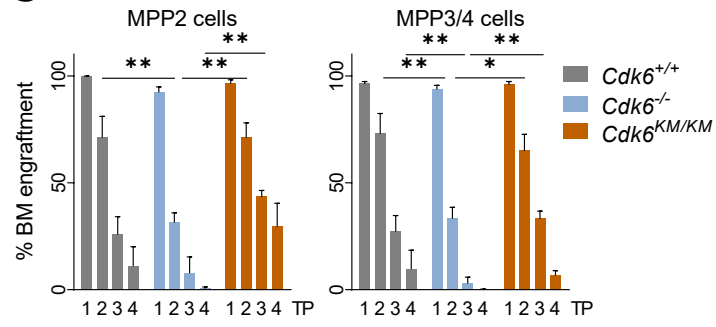

**D**

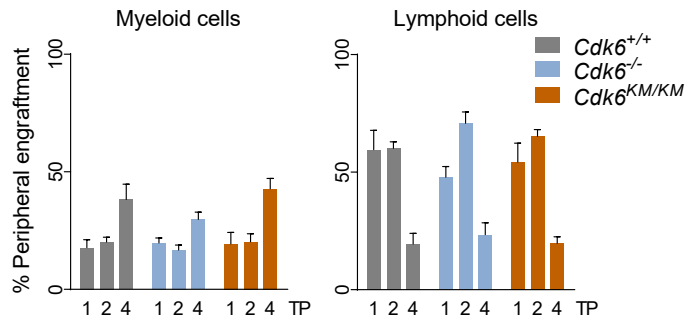

**F**

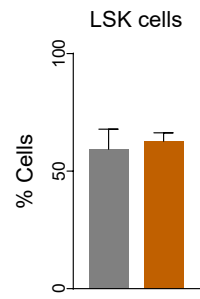

**G**

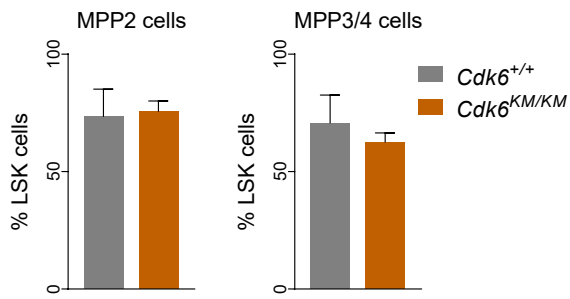

# Supp Fig 4

## A

479 differentially expressed genes between HSCs and MPP1 cells

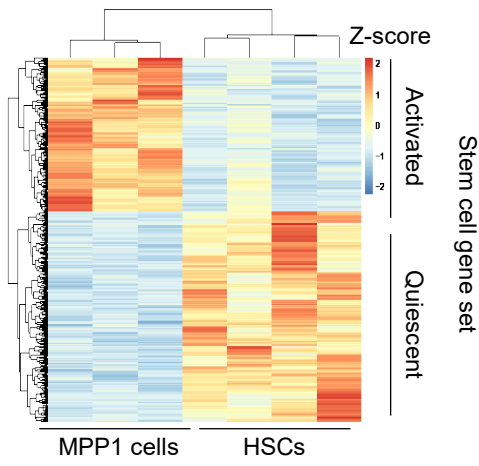

## B

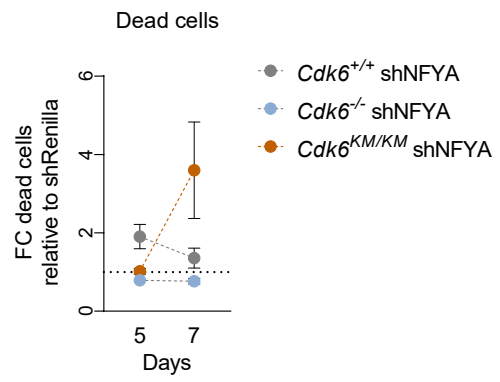

## C

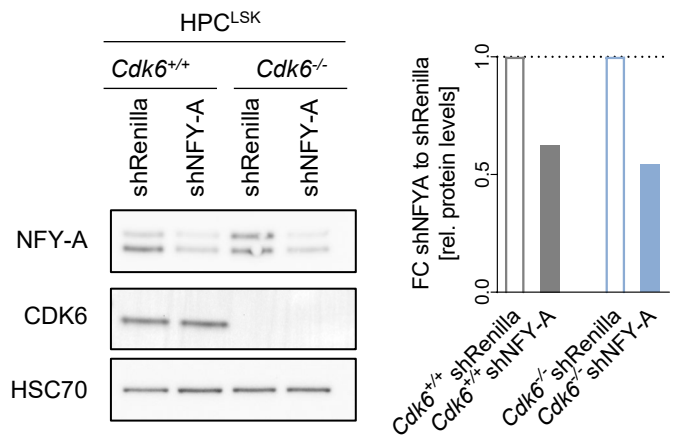

# Supp Fig 5

A

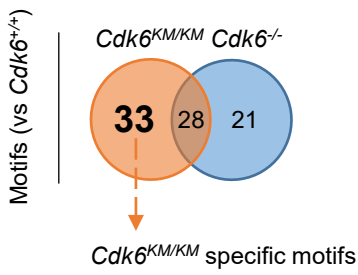

B

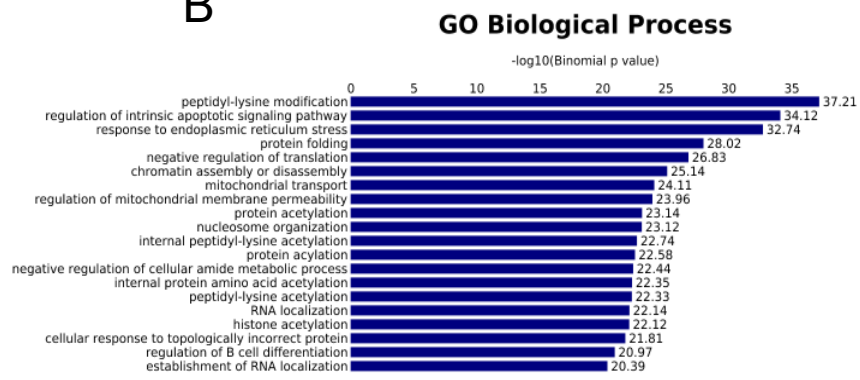

C

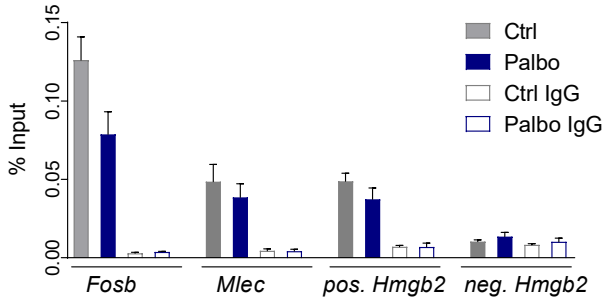

D

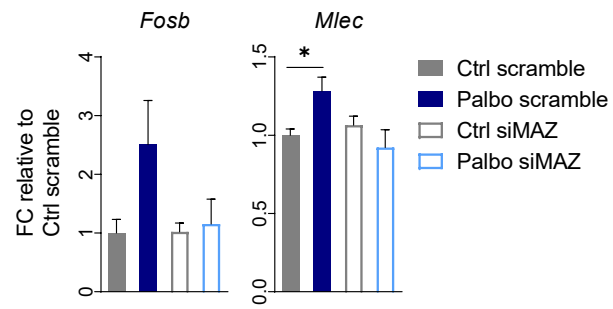

E

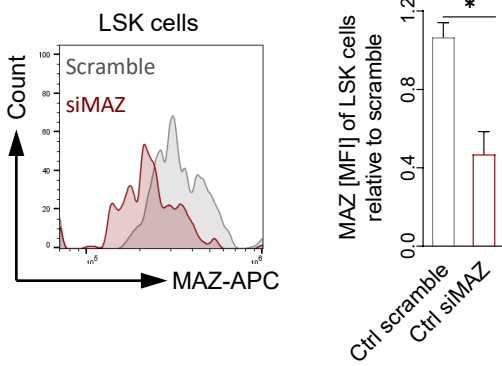

F

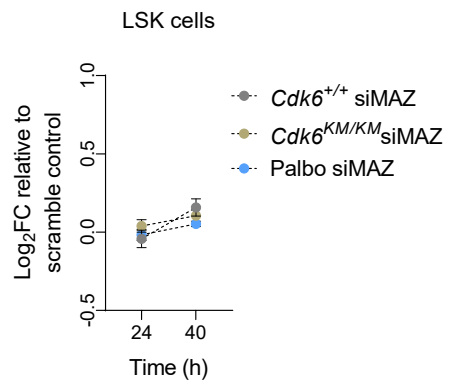

# Supp Fig 6

**A**

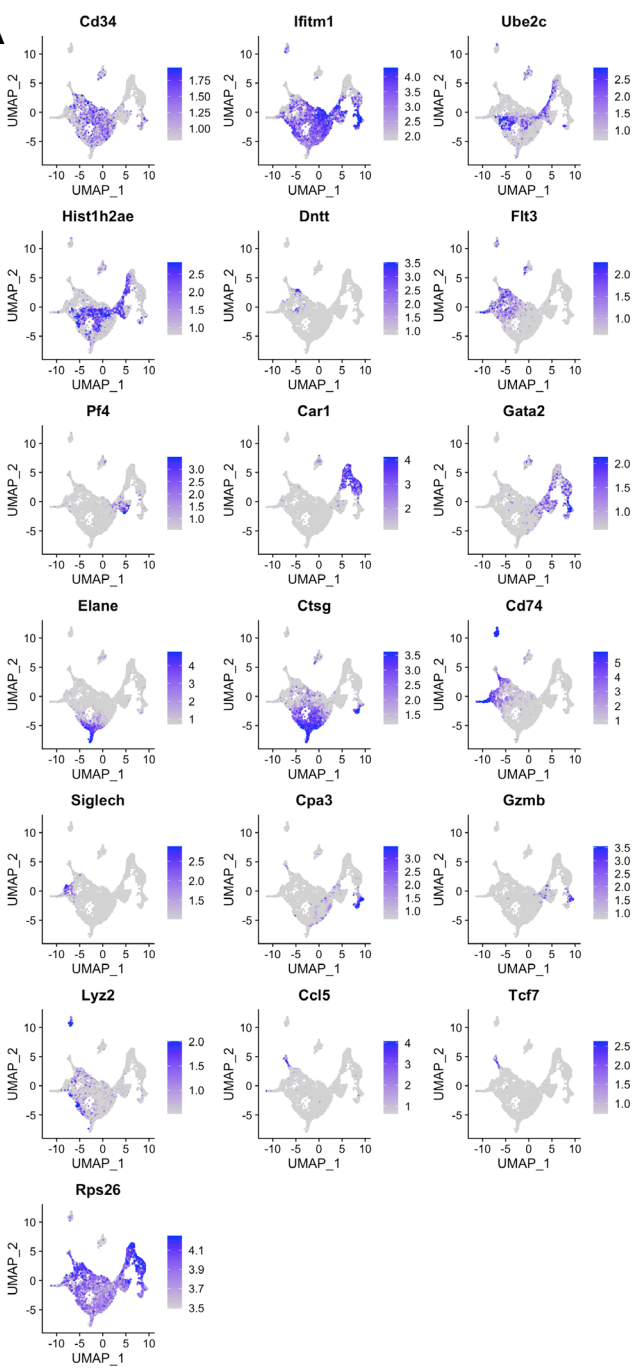

**B**

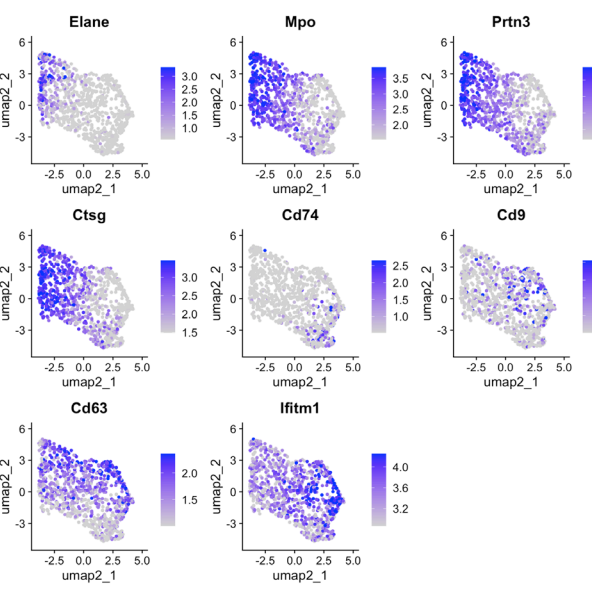

**C**

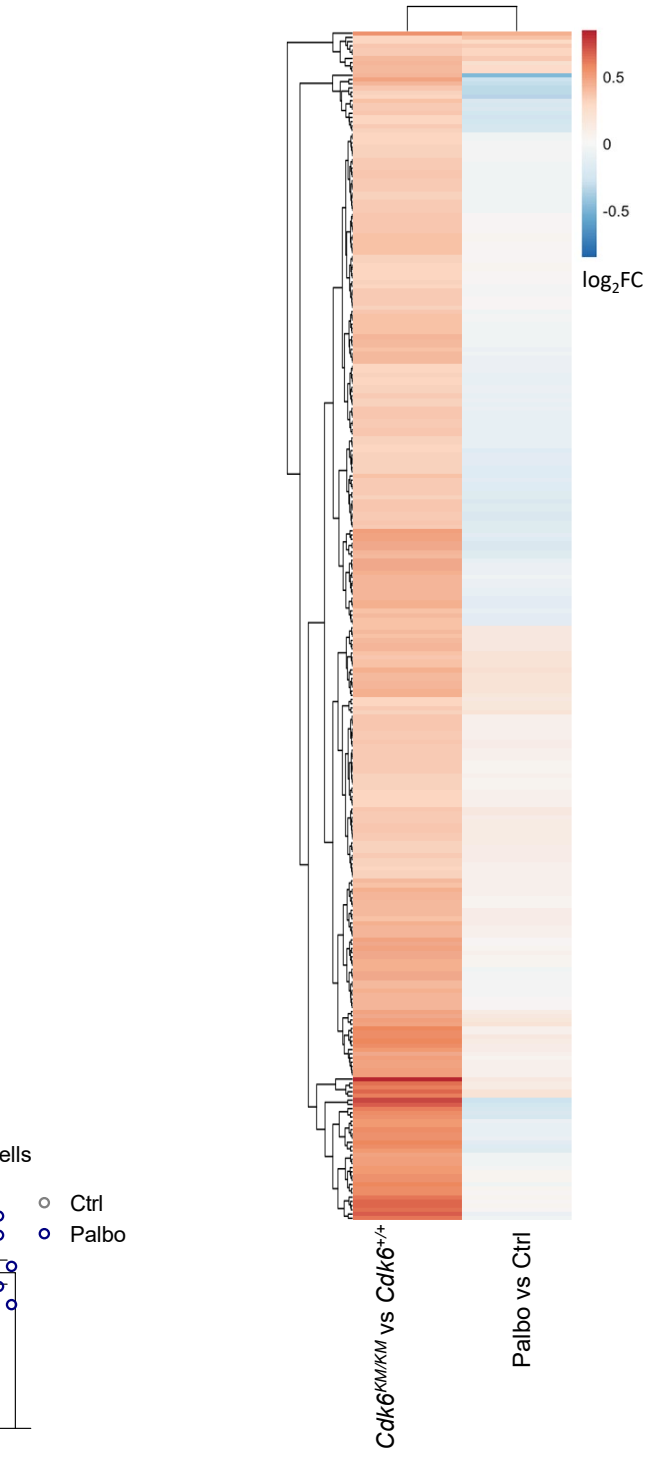

**D**

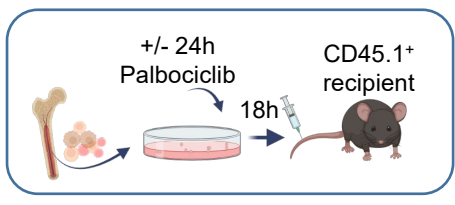

**E**

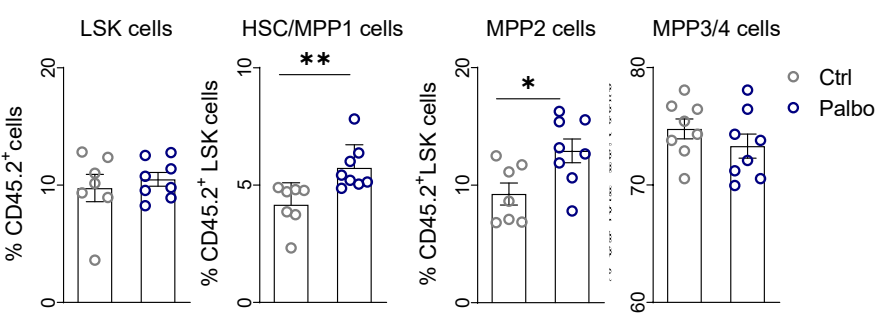

**F**

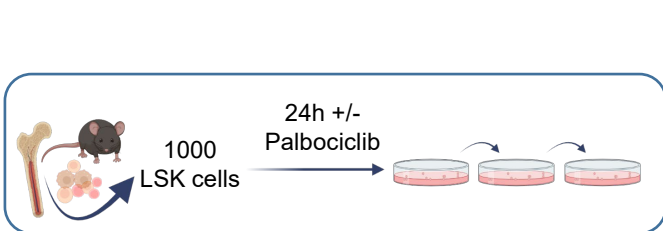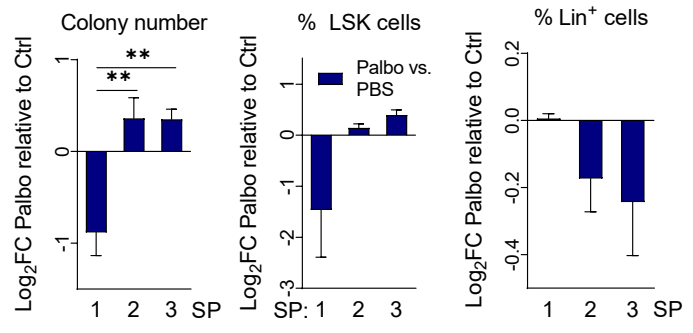

# Supp Fig 6

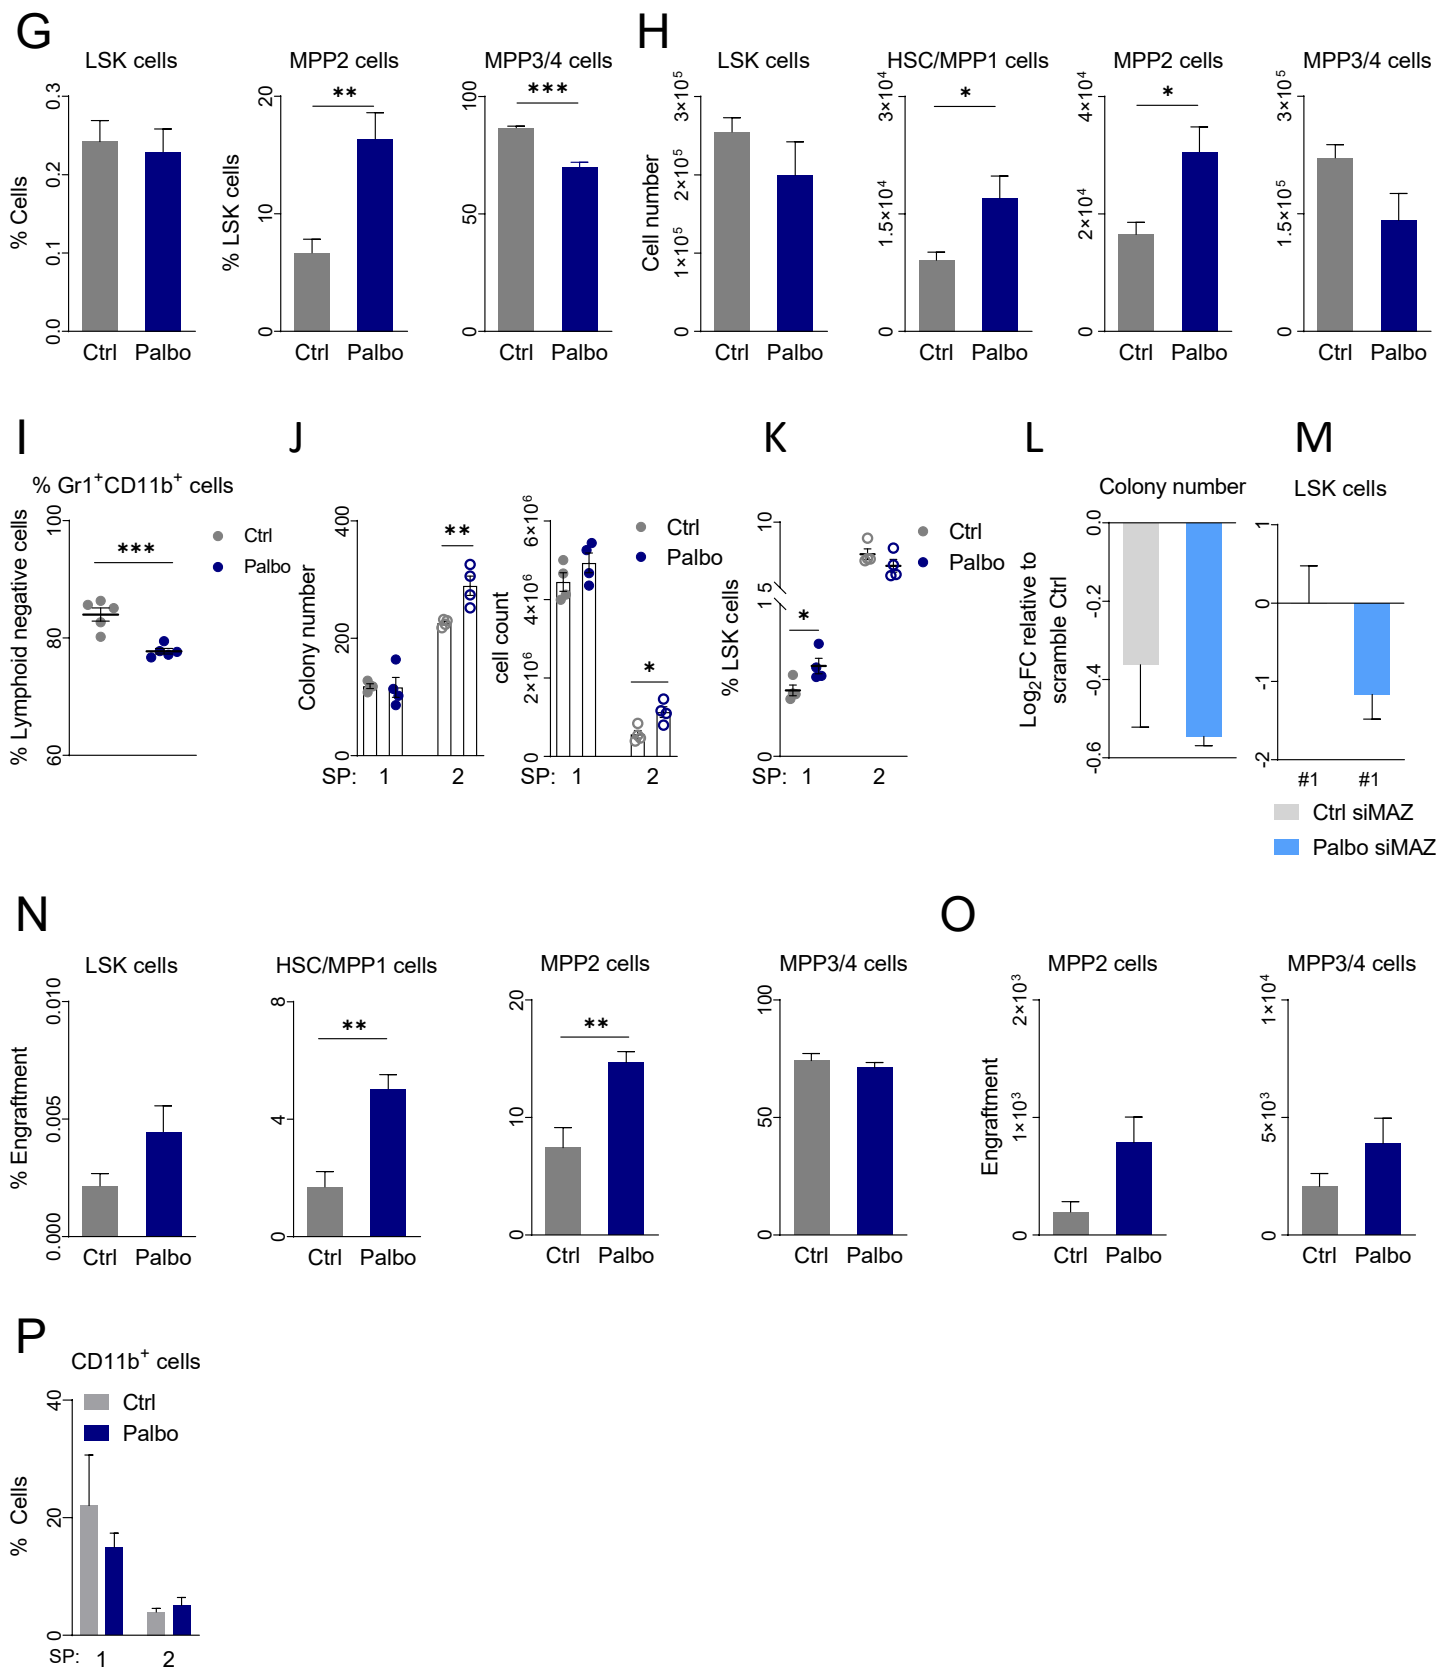

Supplement: BLOOD_BLD-2023-021985-mmc1.pdf [file BLOOD_BLD-2023-021985-mmc1.pdf]
